# Supplementary material
Source: publisher figshare collection journal article supplement (https://gsajournals.figshare.com/ndownloader/files/27742038)
Supplement: Supplementary file 1 [file 27742038]

## Sheet: tRNA_all
	tRNA (including pseudo)	pseudo		References
Metarhizium humberi ESALQ1638	141	6	135
Metarhizium robertsii ARSEF23	141	4	137	141
Metarhizium anisopliae BRIP53293	139	7	132	132
Metarhizium anisopliae ARSEF549	160	13	147
Metarhizium anisopliae E6	143	7	136	181
Metarhizium brunneum ARSEF3297	157	12	145
Metarhizium guizhouense ARSEF977	140	4	136
Metarhizium majus ARSEF297	162	19	143
Metarhizium acridum CQMa102	126	5	121	122
Metarhizium album ARSEF1941	144	22	122
Metarhizium rileyi RCEF4871	117	5	112

## Sheet: meta1638_tRNAout
Sequence		tRNA	Bounds	tRNA	Anti	Intron Bounds		Inf
Name	tRNA #	Begin	End	Type	Codon	Begin	End	Score	Note
--------	------	-----	------	----	-----	-----	----	------	------
Scaffold_0001	1	124812	124883	Glu	CTC	0	0	56.5
Scaffold_0001	2	548921	549012	Glu	TTC	548958	548977	50.6
Scaffold_0001	3	1189156	1189272	Leu	CAA	1189194	1189228	53.1
Scaffold_0001	4	3041412	3041483	iMet	CAT	0	0	68.0
Scaffold_0001	5	3352224	3352332	Leu	TAG	3352261	3352287	70.1
Scaffold_0001	6	3645774	3645882	Arg	ACG	3645810	3645846	55.4
Scaffold_0001	7	3833583	3833690	Arg	ACG	3833619	3833654	59.6
Scaffold_0001	8	3455210	3455139	Gln	CTG	0	0	58.7
Scaffold_0001	9	3238837	3238764	Val	AAC	0	0	76.4
Scaffold_0001	10	3115832	3115751	Gly	GCC	3115796	3115786	58.9
Scaffold_0001	11	3115714	3115633	Gly	GCC	3115678	3115668	58.9
Scaffold_0001	12	2527836	2527733	Pro	TGG	2527800	2527769	67.1
Scaffold_0001	13	2247595	2247512	Ile	AAT	2247557	2247548	77.7
Scaffold_0002	1	1424882	1424979	Phe	GAA	1424919	1424943	63.4
Scaffold_0002	2	1454273	1454361	Thr	TGT	1454309	1454325	72.9
Scaffold_0002	3	2156182	2156288	Arg	CCG	2156218	2156253	64.8
Scaffold_0002	4	2792278	2792374	Ala	AGC	2792314	2792338	64.8
Scaffold_0002	5	2826288	2826394	Ala	CGC	2826325	2826358	61.7
Scaffold_0002	6	2932081	2932164	Lys	CTT	2932118	2932128	78.3
Scaffold_0002	7	2937140	2937213	Val	AAC	0	0	76.4
Scaffold_0002	8	830675	830587	His	GTG	830638	830622	53.4
Scaffold_0002	9	404456	404383	Val	AAC	0	0	76.4
Scaffold_0003	1	87432	87512	Ser	CGA	0	0	75.3
Scaffold_0003	2	1890798	1890716	His	GTG	1890761	1890751	53.8
Scaffold_0003	3	1890651	1890567	His	GTG	1890614	1890602	53.6
Scaffold_0004	1	182423	182528	Ile	TAT	182460	182492	63.3
Scaffold_0004	2	1628700	1628771	Thr	AGT	0	0	81.9
Scaffold_0004	3	1668715	1668631	Lys	CTT	1668678	1668667	78.2
Scaffold_0004	4	1265160	1265069	Ala	AGC	1265124	1265105	65.0
Scaffold_0004	5	1264928	1264836	Ala	AGC	1264892	1264872	59.9
Scaffold_0004	6	968292	968221	Thr	CGT	0	0	64.2
Scaffold_0004	7	528807	528709	Ala	AGC	528771	528745	59.8
Scaffold_0004	8	168817	168731	Tyr	GTA	168778	168767	65.5
Scaffold_0005	1	223607	223678	Asp	GTC	0	0	69.5
Scaffold_0005	2	557527	557617	Tyr	GTA	557566	557581	60.2
Scaffold_0005	3	687136	687227	Gln	TTG	687173	687192	53.2
Scaffold_0005	4	1777405	1777498	Arg	ACG	1777441	1777462	69.4
Scaffold_0005	5	1821624	1821537	Glu	TTC	1821587	1821572	56.1
Scaffold_0005	6	1322387	1322316	Thr	AGT	0	0	81.9
Scaffold_0005	7	432314	432243	Asp	GTC	0	0	69.5
Scaffold_0006	1	7267	7338	Thr	AGT	0	0	79.2
Scaffold_0006	2	57710	57799	Pro	AGG	57746	57763	67.5
Scaffold_0006	3	79090	79173	Ile	AAT	79128	79137	77.7
Scaffold_0006	4	159157	159251	Ala	CGC	159194	159215	51.8
Scaffold_0006	5	320198	320302	Arg	ACG	320234	320266	54.5
Scaffold_0006	6	652100	652198	Leu	AAG	652138	652154	60.1
Scaffold_0006	7	652767	652869	Leu	AAG	652805	652825	59.9
Scaffold_0006	8	1475423	1475496	Asn	GTT	0	0	72.6
Scaffold_0006	9	1678557	1678647	Trp	CCA	1678593	1678611	56.7
Scaffold_0006	10	1535736	1535665	Gln	CTG	0	0	58.7
Scaffold_0006	11	1474545	1474472	Asn	GTT	0	0	71.5
Scaffold_0006	12	1474395	1474262	Asn	GTT	1474357	1474300	47.6
Scaffold_0006	13	1474185	1474112	Asn	GTT	0	0	72.6
Scaffold_0006	14	942494	942385	Met	CAT	942455	942421	77.2
Scaffold_0006	15	900326	900245	Ser	AGA	0	0	73.5
Scaffold_0006	16	536153	536060	Val	TAC	536115	536096	70.8
Scaffold_0006	17	418744	418671	Val	AAC	0	0	76.4
Scaffold_0006	18	280479	280398	Gly	GCC	280443	280433	58.1
Scaffold_0006	19	145816	145654	Ile	GAT	145778	145690	43.7
Scaffold_0007	1	347576	347647	Thr	AGT	0	0	81.9
Scaffold_0007	2	609214	609309	Ala	AGC	609250	609273	64.8
Scaffold_0007	3	931701	931799	Phe	GAA	931738	931763	57.7
Scaffold_0007	4	1218927	1218999	Ala	TGC	0	0	64.5
Scaffold_0007	5	1309708	1309808	Pro	CGG	1309744	1309772	61.7
Scaffold_0007	6	1665161	1665245	Lys	CTT	1665198	1665209	78.2
Scaffold_0007	7	1543957	1543874	Ile	AAT	1543919	1543910	66.0
Scaffold_0007	8	458401	458330	Gln	CTG	0	0	53.0
Scaffold_0008	1	151917	152014	Leu	TAA	151955	151970	61.8
Scaffold_0008	2	183188	183269	Gly	GCC	183224	183234	58.1
Scaffold_0008	3	251071	251151	Ser	GCT	0	0	66.7
Scaffold_0008	4	253457	253377	Ser	GCT	0	0	66.7
Scaffold_0008	5	191789	191683	Ser	GCT	191752	191727	61.9
Scaffold_0009	1	790619	790690	Asp	GTC	0	0	69.5
Scaffold_0009	2	813620	813700	Ser	AGA	0	0	75.5
Scaffold_0009	3	814807	814887	Ser	AGA	0	0	75.5
Scaffold_0009	4	873383	873473	Pro	AGG	873419	873437	67.5
Scaffold_0009	5	1234122	1234024	Arg	TCT	1234085	1234060	70.4
Scaffold_0010	1	280115	280207	Arg	TCG	280152	280171	59.0
Scaffold_0010	2	1160340	1160268	Lys	TTT	0	0	80.7
Scaffold_0010	3	701479	701408	Arg	TCT	0	0	56.2
Scaffold_0010	4	620348	620267	Val	CAC	620311	620302	53.8
Scaffold_0011	1	768377	768306	Glu	CTC	0	0	56.5
Scaffold_0011	2	768176	768105	Glu	CTC	0	0	56.5
Scaffold_0011	3	5902	5831	Thr	CGT	0	0	69.9
Scaffold_0012	1	1009242	1009140	Arg	ACG	1009206	1009176	69.1
Scaffold_0013	1	534622	534723	Ser	CGA	534659	534679	65.5
Scaffold_0013	2	845285	845186	Leu	AAG	845247	845230	60.1
Scaffold_0014	1	727963	728059	Phe	GAA	728000	728023	63.2
Scaffold_0014	2	856080	855971	Met	CAT	856041	856007	77.2
Scaffold_0014	3	775234	775155	Ile	AAT	775200	775191	56.9
Scaffold_0014	4	46523	46426	Phe	GAA	46486	46462	63.1
Scaffold_0015	1	65011	65126	Leu	CAA	65049	65082	53.1
Scaffold_0015	2	162188	162259	Gly	TCC	0	0	57.2
Scaffold_0015	3	311627	311525	Arg	ACG	311591	311561	69.1
Scaffold_0018	1	227804	227890	Tyr	GTA	227843	227854	65.5
Scaffold_0018	2	267923	267994	Asp	GTC	0	0	69.5
Scaffold_0018	3	627201	627273	Ala	TGC	0	0	61.0
Scaffold_0018	4	475012	474908	Arg	ACG	474976	474944	54.2
Scaffold_0018	5	146765	146653	Leu	CAG	146727	146697	58.6
Scaffold_0018	6	111564	111482	Trp	CCA	111528	111518	49.5
Scaffold_0018	7	54645	54536	Leu	CAG	54607	54580	58.7
Scaffold_0020	1	483001	483072	Gly	TCC	0	0	57.2
Scaffold_0020	2	498306	498377	Asp	GTC	0	0	69.5
Scaffold_0022	1	191796	191891	Glu	CTC	191833	191856	51.3
Scaffold_0023	1	374922	374994	Cys	GCA	0	0	75.7
Scaffold_0023	2	373667	373595	Cys	GCA	0	0	76.1
Scaffold_0023	3	97453	97359	Glu	CTC	97416	97394	48.8
Scaffold_0024	1	274041	274146	Arg	ACG	274077	274110	69.0
Scaffold_0024	2	286772	286701	Arg	CCT	0	0	66.8
Scaffold_0025	1	20364	20278	Arg	TCG	20327	20314	59.2
Scaffold_0027	1	135354	135452	Phe	GAA	135391	135416	55.8
Scaffold_0027	2	190908	190991	Ile	AAT	190946	190955	77.7
Scaffold_0027	3	138055	137982	Arg	CCG	0	0	52.2
Scaffold_0029	1	219280	219412	Ser	TGA	219317	219368	56.3
Scaffold_0030	1	141215	141311	Phe	GAA	141252	141275	63.4
Scaffold_0033	1	6543	6615	Arg	TCT	0	0	74.2
Scaffold_0034	1	137267	137348	Gly	GCC	137303	137313	58.9
Scaffold_0035	1	81100	81184	Lys	CTT	81137	81148	78.2
Scaffold_0036	1	87554	87483	Gly	CCC	0	0	71.3
Scaffold_0038	1	44676	44757	Gly	GCC	44712	44722	58.1
Scaffold_0042	1	23194	23275	Gly	GCC	23230	23240	58.1
Scaffold_0042	2	104221	104311	Pro	AGG	104257	104275	67.5
Scaffold_0054	1	13342	13438	Leu	TAA	13379	13401	53.7
Scaffold_0055	1	30713	30797	Lys	CTT	30750	30761	78.2
Scaffold_0058	1	24786	24713	Asp	GTC	0	0	31.2
Scaffold_0058	2	24618	24548	Asn	GTT	0	0	61.2
Scaffold_0058	3	23665	23595	Gly	TCC	0	0	41.0	pseudo
Scaffold_0058	4	22779	22707	Val	TAC	0	0	48.7
Scaffold_0058	5	22605	22519	Undet	NNN	0	0	35.4	pseudo
Scaffold_0058	6	22505	22434	Sup	TCA	0	0	32.0	pseudo
Scaffold_0058	7	20907	20835	Pro	TGG	0	0	42.1
Scaffold_0058	8	16073	16003	Thr	TGT	0	0	30.4	pseudo
Scaffold_0058	9	15997	15925	Glu	TTC	0	0	53.5
Scaffold_0058	10	15825	15753	Met	CAT	0	0	34.8	pseudo
Scaffold_0058	11	15752	15670	Leu	TAA	0	0	44.0
Scaffold_0058	12	15662	15591	Ala	TGC	0	0	36.4	pseudo
Scaffold_0058	13	15587	15515	Phe	GAA	0	0	43.1
Scaffold_0058	14	15511	15439	Lys	TTT	0	0	50.4
Scaffold_0058	15	15271	15199	His	GTG	0	0	43.7
Scaffold_0058	16	15193	15122	Met	CAT	0	0	44.1
Scaffold_0058	17	3634	3564	Arg	TCT	0	0	63.3

## Sheet: Mrob_tRNAout
Sequence		tRNA	Bounds	tRNA	Anti	Intron Bounds		Inf
Name	tRNA #	Begin	End	Type	Codon	Begin	End	Score	Note
--------	------	-----	------	----	-----	-----	----	------	------
gi|734842655|gb|ADNJ02000001.1|	1	1416335	1416440	Ile	TAT	1416372	1416404	63.3
gi|734842655|gb|ADNJ02000001.1|	2	2885266	2885337	Thr	AGT	0	0	81.9
gi|734842655|gb|ADNJ02000001.1|	3	3909616	3909732	Leu	CAA	3909654	3909688	53.1
gi|734842655|gb|ADNJ02000001.1|	4	5760877	5760948	iMet	CAT	0	0	68.0
gi|734842655|gb|ADNJ02000001.1|	5	6071778	6071886	Leu	TAG	6071815	6071841	70.1
gi|734842655|gb|ADNJ02000001.1|	6	6475709	6475817	Arg	ACG	6475745	6475781	48.5
gi|734842655|gb|ADNJ02000001.1|	7	6656367	6656474	Arg	ACG	6656403	6656438	57.6
gi|734842655|gb|ADNJ02000001.1|	8	6976539	6976610	Asp	GTC	0	0	69.5
gi|734842655|gb|ADNJ02000001.1|	9	7326540	7326630	Tyr	GTA	7326579	7326594	60.2
gi|734842655|gb|ADNJ02000001.1|	10	7198769	7198698	Asp	GTC	0	0	69.5
gi|734842655|gb|ADNJ02000001.1|	11	6176481	6176410	Gln	CTG	0	0	58.7
gi|734842655|gb|ADNJ02000001.1|	12	5958455	5958382	Val	AAC	0	0	76.4
gi|734842655|gb|ADNJ02000001.1|	13	5835614	5835533	Gly	GCC	5835578	5835568	58.9
gi|734842655|gb|ADNJ02000001.1|	14	5835496	5835417	Gly	GCC	5835460	5835452	58.9
gi|734842655|gb|ADNJ02000001.1|	15	5246170	5246067	Pro	TGG	5246134	5246103	67.1
gi|734842655|gb|ADNJ02000001.1|	16	4962360	4962277	Ile	AAT	4962322	4962313	77.7
gi|734842655|gb|ADNJ02000001.1|	17	2925542	2925458	Lys	CTT	2925505	2925494	78.2
gi|734842655|gb|ADNJ02000001.1|	18	2521899	2521808	Ala	AGC	2521863	2521844	65.0
gi|734842655|gb|ADNJ02000001.1|	19	2521670	2521578	Ala	AGC	2521634	2521614	59.9
gi|734842655|gb|ADNJ02000001.1|	20	2225963	2225892	Thr	CGT	0	0	64.2
gi|734842655|gb|ADNJ02000001.1|	21	1768656	1768558	Ala	AGC	1768620	1768594	59.8
gi|734842655|gb|ADNJ02000001.1|	22	1402775	1402689	Tyr	GTA	1402736	1402725	65.5
gi|734841079|gb|ADNJ02000002.1|	1	235639	235710	Thr	AGT	0	0	81.9
gi|734841079|gb|ADNJ02000002.1|	2	1180955	1181047	Arg	TCG	1180992	1181011	59.0
gi|734841079|gb|ADNJ02000002.1|	3	4072684	4072768	Lys	CTT	4072721	4072732	78.2
gi|734841079|gb|ADNJ02000002.1|	4	4381337	4381420	Ile	AAT	4381375	4381384	77.7
gi|734841079|gb|ADNJ02000002.1|	5	5311207	5311295	His	GTG	5311244	5311260	53.4
gi|734841079|gb|ADNJ02000002.1|	6	5788328	5788401	Val	AAC	0	0	76.4
gi|734841079|gb|ADNJ02000002.1|	7	4706639	4706567	Ala	TGC	0	0	64.5
gi|734841079|gb|ADNJ02000002.1|	8	4616309	4616209	Pro	CGG	4616273	4616245	61.7
gi|734841079|gb|ADNJ02000002.1|	9	4248954	4248870	Lys	CTT	4248917	4248906	78.2
gi|734841079|gb|ADNJ02000002.1|	10	3706833	3706728	Arg	CCG	3706797	3706763	65.0
gi|734841079|gb|ADNJ02000002.1|	11	3087607	3087511	Ala	AGC	3087571	3087547	64.8
gi|734841079|gb|ADNJ02000002.1|	12	3053285	3053179	Ala	CGC	3053248	3053215	61.7
gi|734841079|gb|ADNJ02000002.1|	13	2947287	2947203	Lys	CTT	2947250	2947239	78.2
gi|734841079|gb|ADNJ02000002.1|	14	2942086	2942013	Val	AAC	0	0	76.4
gi|734841079|gb|ADNJ02000002.1|	15	2063914	2063842	Lys	TTT	0	0	80.7
gi|734841079|gb|ADNJ02000002.1|	16	1604661	1604589	Arg	TCT	0	0	74.2
gi|734841079|gb|ADNJ02000002.1|	17	1523514	1523433	Val	CAC	1523477	1523468	53.8
gi|734841079|gb|ADNJ02000002.1|	18	884489	884398	Gln	TTG	884452	884433	53.2
gi|734840523|gb|ADNJ02000003.1|	1	371875	371946	Asp	GTC	0	0	69.5
gi|734840523|gb|ADNJ02000003.1|	2	394803	394883	Ser	AGA	0	0	75.5
gi|734840523|gb|ADNJ02000003.1|	3	396130	396210	Ser	AGA	0	0	75.5
gi|734840523|gb|ADNJ02000003.1|	4	628547	628617	Arg	TCT	0	0	63.3
gi|734840523|gb|ADNJ02000003.1|	5	634509	634582	Asp	GTC	0	0	31.2
gi|734840523|gb|ADNJ02000003.1|	6	634677	634747	Asn	GTT	0	0	61.2
gi|734840523|gb|ADNJ02000003.1|	7	635630	635700	Gly	TCC	0	0	41.0	pseudo
gi|734840523|gb|ADNJ02000003.1|	8	636516	636588	Val	TAC	0	0	48.7
gi|734840523|gb|ADNJ02000003.1|	9	636690	636776	Undet	NNN	0	0	35.4	pseudo
gi|734840523|gb|ADNJ02000003.1|	10	636790	636861	Sup	TCA	0	0	33.1	pseudo
gi|734840523|gb|ADNJ02000003.1|	11	638389	638461	Pro	TGG	0	0	42.1
gi|734840523|gb|ADNJ02000003.1|	12	643223	643293	Thr	TGT	0	0	30.4	pseudo
gi|734840523|gb|ADNJ02000003.1|	13	643299	643371	Glu	TTC	0	0	53.5
gi|734840523|gb|ADNJ02000003.1|	14	643544	643626	Leu	TAA	0	0	44.0
gi|734840523|gb|ADNJ02000003.1|	15	643784	643856	Lys	TTT	0	0	40.2
gi|734840523|gb|ADNJ02000003.1|	16	644024	644096	His	GTG	0	0	43.7
gi|734840523|gb|ADNJ02000003.1|	17	644102	644173	Met	CAT	0	0	44.1
gi|734840523|gb|ADNJ02000003.1|	18	934887	934958	Glu	CTC	0	0	56.5
gi|734840523|gb|ADNJ02000003.1|	19	1368669	1368760	Glu	TTC	1368706	1368725	50.6
gi|734840523|gb|ADNJ02000003.1|	20	1580004	1580101	Leu	TAA	1580042	1580057	61.8
gi|734840523|gb|ADNJ02000003.1|	21	1611296	1611377	Gly	GCC	1611332	1611342	61.5
gi|734840523|gb|ADNJ02000003.1|	22	1679214	1679294	Ser	GCT	0	0	66.7
gi|734840523|gb|ADNJ02000003.1|	23	3664862	3664958	Phe	GAA	3664899	3664922	63.2
gi|734840523|gb|ADNJ02000003.1|	24	4986819	4986738	Gly	GCC	4986783	4986773	58.1
gi|734840523|gb|ADNJ02000003.1|	25	4851520	4851439	Gly	GCC	4851484	4851474	58.1
gi|734840523|gb|ADNJ02000003.1|	26	4779814	4779724	Pro	AGG	4779778	4779760	67.5
gi|734840523|gb|ADNJ02000003.1|	27	4606847	4606752	Glu	CTC	4606810	4606787	51.3
gi|734840523|gb|ADNJ02000003.1|	28	3799134	3799025	Met	CAT	3799095	3799061	77.2
gi|734840523|gb|ADNJ02000003.1|	29	3718325	3718242	Ile	AAT	3718287	3718278	77.7
gi|734840523|gb|ADNJ02000003.1|	30	1681603	1681523	Ser	GCT	0	0	64.7
gi|734840523|gb|ADNJ02000003.1|	31	1619712	1619606	Ser	GCT	1619675	1619650	61.9
gi|734840067|gb|ADNJ02000004.1|	1	135156	135229	Arg	CCG	0	0	52.2
gi|734840067|gb|ADNJ02000004.1|	2	644070	644150	Ser	CGA	0	0	75.3
gi|734840067|gb|ADNJ02000004.1|	3	3439528	3439600	Cys	GCA	0	0	75.7
gi|734840067|gb|ADNJ02000004.1|	4	3715450	3715582	Ser	TGA	3715487	3715538	56.3
gi|734840067|gb|ADNJ02000004.1|	5	3438259	3438187	Cys	GCA	0	0	76.1
gi|734840067|gb|ADNJ02000004.1|	6	3161984	3161890	Glu	CTC	3161947	3161925	48.8
gi|734840067|gb|ADNJ02000004.1|	7	2532374	2532292	His	GTG	2532337	2532327	53.8
gi|734840067|gb|ADNJ02000004.1|	8	2532233	2532149	His	GTG	2532196	2532184	53.6
gi|734840067|gb|ADNJ02000004.1|	9	284224	284140	Lys	CTT	284187	284176	78.2
gi|734840067|gb|ADNJ02000004.1|	10	137934	137836	Phe	GAA	137897	137872	62.0
gi|734840067|gb|ADNJ02000004.1|	11	82365	82282	Ile	AAT	82327	82318	53.9
gi|734839658|gb|ADNJ02000005.1|	1	143570	143651	Gly	GCC	143606	143616	58.9
gi|734839658|gb|ADNJ02000005.1|	2	1795972	1796043	Glu	CTC	0	0	56.5
gi|734839658|gb|ADNJ02000005.1|	3	1796173	1796244	Glu	CTC	0	0	56.5
gi|734839658|gb|ADNJ02000005.1|	4	1796374	1796445	Glu	CTC	0	0	56.5
gi|734839658|gb|ADNJ02000005.1|	5	1796575	1796646	Glu	CTC	0	0	56.5
gi|734839658|gb|ADNJ02000005.1|	6	2556194	2556265	Thr	CGT	0	0	69.9
gi|734839658|gb|ADNJ02000005.1|	7	2809686	2809785	Leu	AAG	2809724	2809741	60.1
gi|734839658|gb|ADNJ02000005.1|	8	3735429	3735343	Arg	TCG	3735392	3735379	59.2
gi|734839658|gb|ADNJ02000005.1|	9	3119438	3119337	Ser	CGA	3119401	3119381	65.5
gi|734839658|gb|ADNJ02000005.1|	10	1404950	1404848	Arg	ACG	1404914	1404884	69.1
gi|734839420|gb|ADNJ02000006.1|	1	728395	728507	Leu	CAG	728433	728463	58.6
gi|734839420|gb|ADNJ02000006.1|	2	755403	755485	Trp	CCA	755439	755449	49.5
gi|734839420|gb|ADNJ02000006.1|	3	816102	816211	Leu	CAG	816140	816167	58.7
gi|734839420|gb|ADNJ02000006.1|	4	1521141	1521212	Gln	CTG	0	0	53.0
gi|734839420|gb|ADNJ02000006.1|	5	2105767	2105854	Glu	TTC	2105804	2105819	56.1
gi|734839420|gb|ADNJ02000006.1|	6	2150006	2149913	Arg	ACG	2149970	2149949	69.4
gi|734839420|gb|ADNJ02000006.1|	7	1631807	1631736	Thr	AGT	0	0	81.9
gi|734839420|gb|ADNJ02000006.1|	8	1370832	1370737	Ala	AGC	1370796	1370773	64.8
gi|734839420|gb|ADNJ02000006.1|	9	1047669	1047571	Phe	GAA	1047632	1047607	62.0
gi|734839420|gb|ADNJ02000006.1|	10	644368	644282	Tyr	GTA	644329	644318	65.5
gi|734839420|gb|ADNJ02000006.1|	11	430864	430793	Asp	GTC	0	0	69.5
gi|734839420|gb|ADNJ02000006.1|	12	123499	123427	Ala	TGC	0	0	60.7
gi|734839229|gb|ADNJ02000007.1|	1	292615	292686	Thr	AGT	0	0	79.2
gi|734839229|gb|ADNJ02000007.1|	2	342993	343082	Pro	AGG	343029	343046	67.5
gi|734839229|gb|ADNJ02000007.1|	3	364323	364406	Ile	AAT	364361	364370	77.7
gi|734839229|gb|ADNJ02000007.1|	4	435302	435404	Ala	CGC	435338	435368	62.2
gi|734839229|gb|ADNJ02000007.1|	5	588325	588429	Arg	ACG	588361	588393	54.5
gi|734839229|gb|ADNJ02000007.1|	6	921153	921251	Leu	AAG	921191	921207	60.1
gi|734839229|gb|ADNJ02000007.1|	7	921820	921922	Leu	AAG	921858	921878	59.9
gi|734839229|gb|ADNJ02000007.1|	8	1774292	1774365	Asn	GTT	0	0	64.6
gi|734839229|gb|ADNJ02000007.1|	9	1834866	1834795	Gln	CTG	0	0	58.7
gi|734839229|gb|ADNJ02000007.1|	10	1773399	1773326	Asn	GTT	0	0	71.5
gi|734839229|gb|ADNJ02000007.1|	11	1773249	1773116	Asn	GTT	1773211	1773154	49.2
gi|734839229|gb|ADNJ02000007.1|	12	1773041	1772968	Asn	GTT	0	0	72.6
gi|734839229|gb|ADNJ02000007.1|	13	1217727	1217618	Met	CAT	1217688	1217654	77.2
gi|734839229|gb|ADNJ02000007.1|	14	1175452	1175371	Ser	AGA	0	0	73.5
gi|734839229|gb|ADNJ02000007.1|	15	805095	805002	Val	TAC	805057	805038	70.8
gi|734839229|gb|ADNJ02000007.1|	16	687077	687004	Val	AAC	0	0	76.4
gi|734839229|gb|ADNJ02000007.1|	17	548520	548439	Gly	GCC	548484	548474	58.1
gi|734839229|gb|ADNJ02000007.1|	18	431861	431740	Sup	CTA	431817	431775	40.4
gi|734839229|gb|ADNJ02000007.1|	19	430901	430780	Sup	CTA	430857	430815	40.4
gi|734838983|gb|ADNJ02000008.1|	1	1385638	1385541	Phe	GAA	1385601	1385577	63.4
gi|734838983|gb|ADNJ02000008.1|	2	1353246	1353158	Thr	TGT	1353210	1353194	72.9
gi|734838848|gb|ADNJ02000009.1|	1	852251	852367	Leu	CAA	852289	852323	53.1
gi|734838848|gb|ADNJ02000009.1|	2	949074	949145	Gly	TCC	0	0	57.2
gi|734838719|gb|ADNJ02000010.1|	1	17916	18006	Pro	AGG	17952	17970	67.5
gi|734838719|gb|ADNJ02000010.1|	2	1257492	1257563	Gly	CCC	0	0	71.3
gi|734838719|gb|ADNJ02000010.1|	3	394318	394220	Arg	TCT	394281	394256	64.2
gi|734838569|gb|ADNJ02000011.1|	1	1095474	1095384	Trp	CCA	1095438	1095420	56.7
gi|734838569|gb|ADNJ02000011.1|	2	355389	355318	Gly	TCC	0	0	57.2
gi|734838569|gb|ADNJ02000011.1|	3	339945	339874	Asp	GTC	0	0	69.5
gi|734838512|gb|ADNJ02000012.1|	1	371182	371276	Arg	ACG	371218	371240	69.4
gi|734838369|gb|ADNJ02000014.1|	1	77896	77967	Arg	CCT	0	0	66.8
gi|734838369|gb|ADNJ02000014.1|	2	411365	411268	Phe	GAA	411328	411304	63.1
gi|734838369|gb|ADNJ02000014.1|	3	88627	88522	Arg	ACG	88591	88558	69.0
gi|734837285|gb|ADNJ02000018.1|	1	56603	56699	Leu	TAA	56640	56662	53.7
gi|734836214|gb|ADNJ02000024.1|	1	3880	3984	Arg	ACG	3916	3948	52.0
gi|734836180|gb|ADNJ02000029.1|	1	29711	29609	Arg	ACG	29675	29645	69.1
gi|734836136|gb|ADNJ02000034.1|	1	6508	6604	Phe	GAA	6545	6568	54.1

## Sheet: ManiB_tRNAout
Sequence		tRNA	Bounds	tRNA	Anti	Intron Bounds		Inf
Name	tRNA #	Begin	End	Type	Codon	Begin	End	Score	Note
--------	------	-----	------	----	-----	-----	----	------	------
KE384718.1	1	425098	425016	His	GTG	425061	425051	53.8
KE384718.1	2	424951	424867	His	GTG	424914	424902	53.6
KE384719.1	1	1251474	1251558	Lys	CTT	1251511	1251522	78.2
KE384719.1	2	1655002	1655093	Ala	AGC	1655038	1655057	65.0
KE384719.1	3	1655231	1655323	Ala	AGC	1655267	1655287	59.9
KE384719.1	4	1951266	1951337	Thr	CGT	0	0	64.2
KE384719.1	5	1291793	1291722	Thr	AGT	0	0	81.9
KE384719.1	6	278959	278843	Leu	CAA	278921	278887	53.1
KE384720.1	1	244842	244936	Arg	ACG	244878	244900	69.4
KE384721.1	1	247983	248113	Undet	NNN	0	0	23.4	pseudo
KE384721.1	2	2122173	2122076	Phe	GAA	2122136	2122112	63.4
KE384721.1	3	2088548	2088460	Thr	TGT	2088512	2088496	72.9
KE384721.1	4	1401845	1401739	Arg	CCG	1401809	1401774	64.8
KE384721.1	5	767760	767664	Ala	AGC	767724	767700	64.8
KE384721.1	6	733626	733520	Ala	CGC	733589	733556	61.7
KE384721.1	7	627791	627708	Lys	CTT	627754	627744	78.3
KE384721.1	8	622637	622564	Val	AAC	0	0	76.4
KE384722.1	1	365	485	Undet	NNN	0	0	35.4
KE384722.1	2	138761	138690	Thr	AGT	0	0	79.2
KE384722.1	3	88383	88294	Pro	AGG	88347	88330	67.5
KE384722.1	4	67001	66918	Ile	AAT	66963	66954	77.7
KE384723.1	1	49791	49872	Gly	GCC	49827	49837	58.1
KE384723.1	2	138923	139013	Pro	AGG	138959	138977	67.5
KE384723.1	3	310791	310886	Glu	CTC	310828	310851	51.3
KE384724.1	1	1384689	1384609	Ser	CGA	0	0	75.3
KE384725.1	1	322286	322357	Gln	CTG	0	0	58.7
KE384725.1	2	539824	539897	Val	AAC	0	0	76.4
KE384725.1	3	726876	726947	iMet	CAT	0	0	68.0
KE384725.1	4	1251460	1251563	Pro	TGG	1251496	1251527	67.1
KE384725.1	5	1527644	1527727	Ile	AAT	1527682	1527691	77.7
KE384725.1	6	801067	800986	Gly	GCC	801031	801021	58.9
KE384725.1	7	800949	800870	Gly	GCC	800913	800905	58.9
KE384725.1	8	426347	426239	Leu	TAG	426310	426284	70.1
KE384725.1	9	132740	132632	Arg	ACG	132704	132668	55.4
KE384727.1	1	730559	730664	Ile	TAT	730596	730628	63.3
KE384727.1	2	1075330	1075232	Ala	AGC	1075294	1075268	59.8
KE384727.1	3	716946	716860	Tyr	GTA	716907	716896	65.5
KE384728.1	1	447124	447036	His	GTG	447087	447071	53.4
KE384728.1	2	23831	23758	Val	AAC	0	0	76.4
KE384729.1	1	477019	477103	Lys	CTT	477056	477067	78.2
KE384729.1	2	776557	776640	Ile	AAT	776595	776604	77.7
KE384729.1	3	1861073	1861144	Gln	CTG	0	0	53.0
KE384729.1	4	2447674	2447761	Glu	TTC	2447711	2447726	56.1
KE384729.1	5	2491093	2491000	Arg	ACG	2491057	2491036	69.4
KE384729.1	6	1972122	1972051	Thr	AGT	0	0	81.9
KE384729.1	7	1710837	1710742	Ala	AGC	1710801	1710778	64.8
KE384729.1	8	1388485	1388387	Phe	GAA	1388448	1388423	62.0
KE384729.1	9	1101561	1101489	Ala	TGC	0	0	64.5
KE384729.1	10	1010758	1010658	Pro	CGG	1010722	1010694	61.7
KE384729.1	11	655218	655134	Lys	CTT	655181	655170	78.2
KE384729.1	12	292063	291992	Gly	TCC	0	0	57.2
KE384729.1	13	276916	276845	Asp	GTC	0	0	69.5
KE384730.1	1	408212	408283	Gln	CTG	0	0	58.7
KE384730.1	2	469434	469567	Asn	GTT	469472	469529	49.2
KE384730.1	3	469642	469715	Asn	GTT	0	0	72.6
KE384730.1	4	1003850	1003959	Met	CAT	1003889	1003923	77.2
KE384730.1	5	1046217	1046298	Ser	AGA	0	0	73.5
KE384730.1	6	1406646	1406739	Val	TAC	1406684	1406703	70.8
KE384730.1	7	1525155	1525228	Val	AAC	0	0	76.4
KE384730.1	8	1663332	1663413	Gly	GCC	1663368	1663378	58.1
KE384730.1	9	1623686	1623582	Arg	ACG	1623650	1623618	48.8
KE384730.1	10	1290733	1290635	Leu	AAG	1290695	1290679	60.1
KE384730.1	11	1290070	1289968	Leu	AAG	1290032	1290012	59.9
KE384730.1	12	468412	468339	Asn	GTT	0	0	72.6
KE384730.1	13	268632	268542	Trp	CCA	268596	268578	56.7
KE384731.1	1	18424	18536	Leu	CAG	18462	18492	58.6
KE384731.1	2	51996	52078	Trp	CCA	52032	52042	49.5
KE384731.1	3	111700	111809	Leu	CAG	111738	111765	58.7
KE384732.1	1	1058797	1058695	Arg	ACG	1058761	1058731	69.1
KE384733.1	1	276973	277044	Thr	CGT	0	0	69.9
KE384734.1	1	239455	239526	Thr	AGT	0	0	81.9
KE384735.1	1	759076	759163	Arg	TCG	759113	759127	59.2
KE384735.1	2	153117	153045	Ala	TGC	0	0	61.0
KE384736.1	1	166001	166103	Arg	ACG	166037	166067	69.1
KE384736.1	2	403807	403692	Leu	CAA	403769	403736	53.1
KE384737.1	1	198826	198925	Leu	AAG	198864	198881	60.1
KE384737.1	2	505120	505019	Ser	CGA	505083	505063	65.5
KE384738.1	1	587624	587716	Arg	TCG	587661	587680	59.0
KE384738.1	2	1467191	1467119	Lys	TTT	0	0	80.7
KE384738.1	3	1008818	1008746	Arg	TCT	0	0	74.2
KE384738.1	4	927605	927524	Val	CAC	927568	927559	53.8
KE384738.1	5	298513	298422	Gln	TTG	298476	298457	53.2
KE384742.1	1	988285	988381	Phe	GAA	988322	988345	38.4
KE384742.1	2	1114586	1114477	Met	CAT	1114547	1114513	77.2
KE384742.1	3	1035014	1034931	Ile	AAT	1034976	1034967	77.7
KE384743.1	1	204041	204173	Ser	TGA	204078	204129	56.3
KE384744.1	1	74413	74485	Cys	GCA	0	0	76.1
KE384744.1	2	348808	348902	Glu	CTC	348845	348867	48.8
KE384744.1	3	73156	73084	Cys	GCA	0	0	75.7
KE384745.1	1	91086	91191	Arg	ACG	91122	91155	69.0
KE384745.1	2	101519	101448	Arg	CCT	0	0	70.9
KE384747.1	1	225907	226005	Arg	TCT	225944	225969	66.4
KE384747.1	2	671677	671606	Asp	GTC	0	0	69.5
KE384747.1	3	649051	648971	Ser	AGA	0	0	75.5
KE384747.1	4	647883	647803	Ser	AGA	0	0	75.5
KE384747.1	5	591055	590965	Pro	AGG	591019	591001	67.5
KE384749.1	1	949289	949369	Ser	GCT	0	0	66.7
KE384749.1	2	1029946	1030052	Ser	GCT	1029983	1030008	61.9
KE384749.1	3	1280651	1280560	Glu	TTC	1280614	1280595	50.6
KE384749.1	4	1069753	1069656	Leu	TAA	1069715	1069700	61.8
KE384749.1	5	1038433	1038352	Gly	GCC	1038397	1038387	58.1
KE384749.1	6	951664	951584	Ser	GCT	0	0	66.7
KE384750.1	1	233840	233924	Lys	CTT	233877	233888	78.2
KE384750.1	2	380577	380675	Phe	GAA	380614	380639	62.0
KE384750.1	3	435143	435226	Ile	AAT	435181	435190	77.7
KE384750.1	4	383342	383269	Arg	CCG	0	0	52.2
KE384752.1	1	85782	85853	Gly	CCC	0	0	71.3
KE384752.1	2	390354	390450	Phe	GAA	390391	390414	63.4
KE384752.1	3	9748	9652	Leu	TAA	9711	9689	53.7
KE384753.1	1	197862	197933	Asp	GTC	0	0	69.5
KE384753.1	2	71779	71689	Tyr	GTA	71740	71725	60.2
KE384754.1	1	73814	73733	Gly	GCC	73778	73768	58.1
KE384756.1	1	127903	127822	Gly	GCC	127867	127857	58.9
KE384756.1	2	67493	67395	Leu	AAG	67455	67439	60.1
KE384760.1	1	164057	163986	Asp	GTC	0	0	69.5
KE384762.1	1	61661	61747	Tyr	GTA	61700	61711	65.5
KE384762.1	2	106502	106573	Asp	GTC	0	0	69.5
KE384763.1	1	90176	90273	Phe	GAA	90213	90237	63.1
KE384768.1	1	33763	33870	Arg	ACG	33799	33834	58.4
KE384770.1	1	60630	60734	Ser	ACT	60666	60698	56.4
KE384776.1	1	186	257	Glu	CTC	0	0	56.5
KE384776.1	2	387	458	Glu	CTC	0	0	56.5
KE384782.1	1	24505	24435	Thr	TGT	0	0	30.4	pseudo
KE384782.1	2	24429	24357	Glu	TTC	0	0	53.5
KE384782.1	3	24255	24183	Met	CAT	0	0	34.8	pseudo
KE384782.1	4	24182	24100	Leu	TAA	0	0	44.0
KE384782.1	5	24092	24021	Ala	TGC	0	0	36.4	pseudo
KE384782.1	6	24017	23945	Phe	GAA	0	0	43.1
KE384782.1	7	23941	23869	Lys	TTT	0	0	50.4
KE384782.1	8	23701	23629	His	GTG	0	0	43.7
KE384782.1	9	23623	23552	Met	CAT	0	0	44.1
KE384782.1	10	14229	14159	Arg	TCT	0	0	63.3
KE384782.1	11	8267	8194	Asp	GTC	0	0	31.2
KE384782.1	12	8099	8029	Val	AAC	0	0	51.6
KE384782.1	13	7146	7076	Gly	TCC	0	0	41.0	pseudo
KE384782.1	14	6260	6188	Val	TAC	0	0	48.7
KE384782.1	15	6086	6000	Undet	NNN	0	0	35.4	pseudo
KE384782.1	16	5986	5915	Sup	TCA	0	0	32.0	pseudo
KE384782.1	17	4387	4315	Pro	TGG	0	0	42.1

## Sheet: ManiA_tRNAout
Sequence		tRNA	Bounds	tRNA	Anti	Intron Bounds		Inf
Name	tRNA #	Begin	End	Type	Codon	Begin	End	Score	Note
--------	------	-----	------	----	-----	-----	----	------	------
gi|743639034|gb|AZNF01000001.1|	1	369717	369821	Arg	ACG	369753	369785	63.1
gi|743639034|gb|AZNF01000001.1|	2	814174	814283	Leu	CAG	814212	814239	58.7
gi|743639034|gb|AZNF01000001.1|	3	913753	913837	Lys	CTT	913790	913801	78.2
gi|743639034|gb|AZNF01000001.1|	4	1212378	1212461	Ile	AAT	1212416	1212425	77.7
gi|743639034|gb|AZNF01000001.1|	5	2315541	2315612	Gln	CTG	0	0	53.0
gi|743639034|gb|AZNF01000001.1|	6	3156398	3156470	Cys	GCA	0	0	76.1
gi|743639034|gb|AZNF01000001.1|	7	3432912	3433006	Glu	CTC	3432949	3432971	48.8
gi|743639034|gb|AZNF01000001.1|	8	4057432	4057514	His	GTG	4057469	4057479	53.8
gi|743639034|gb|AZNF01000001.1|	9	4057575	4057659	His	GTG	4057612	4057624	53.6
gi|743639034|gb|AZNF01000001.1|	10	3155119	3155047	Cys	GCA	0	0	75.7
gi|743639034|gb|AZNF01000001.1|	11	2894962	2894830	Ser	TGA	2894925	2894874	56.3
gi|743639034|gb|AZNF01000001.1|	12	2426371	2426300	Thr	AGT	0	0	81.9
gi|743639034|gb|AZNF01000001.1|	13	2165237	2165142	Ala	AGC	2165201	2165178	64.8
gi|743639034|gb|AZNF01000001.1|	14	1842846	1842748	Phe	GAA	1842809	1842784	62.0
gi|743639034|gb|AZNF01000001.1|	15	1555907	1555835	Ala	TGC	0	0	64.5
gi|743639034|gb|AZNF01000001.1|	16	1465464	1465363	Pro	CGG	1465428	1465399	61.6
gi|743639034|gb|AZNF01000001.1|	17	1091767	1091683	Lys	CTT	1091730	1091719	78.2
gi|743639034|gb|AZNF01000001.1|	18	766635	766523	Leu	CAG	766597	766567	58.6
gi|743639034|gb|AZNF01000001.1|	19	739886	739804	Trp	CCA	739850	739840	49.5
gi|743639034|gb|AZNF01000001.1|	20	538447	538361	Tyr	GTA	538408	538397	65.5
gi|743639034|gb|AZNF01000001.1|	21	498198	498127	Asp	GTC	0	0	69.5
gi|743639034|gb|AZNF01000001.1|	22	216461	216389	Ala	TGC	0	0	61.0
gi|743637694|gb|AZNF01000002.1|	1	369412	369493	Gly	GCC	369448	369458	58.1
gi|743637694|gb|AZNF01000002.1|	2	494668	494749	Gly	GCC	494704	494714	58.1
gi|743637694|gb|AZNF01000002.1|	3	561918	562008	Pro	AGG	561954	561972	67.5
gi|743637694|gb|AZNF01000002.1|	4	728487	728582	Glu	CTC	728524	728547	51.3
gi|743637694|gb|AZNF01000002.1|	5	1288316	1288425	Met	CAT	1288355	1288389	77.2
gi|743637694|gb|AZNF01000002.1|	6	1368932	1369015	Ile	AAT	1368970	1368979	77.7
gi|743637694|gb|AZNF01000002.1|	7	3375791	3375871	Ser	GCT	0	0	66.7
gi|743637694|gb|AZNF01000002.1|	8	3436738	3436844	Ser	GCT	3436775	3436800	61.9
gi|743637694|gb|AZNF01000002.1|	9	4105884	4105813	Glu	CTC	0	0	56.5
gi|743637694|gb|AZNF01000002.1|	10	3688096	3688005	Glu	TTC	3688059	3688040	50.6
gi|743637694|gb|AZNF01000002.1|	11	3476898	3476801	Leu	TAA	3476860	3476845	61.8
gi|743637694|gb|AZNF01000002.1|	12	3445585	3445504	Gly	GCC	3445549	3445539	58.1
gi|743637694|gb|AZNF01000002.1|	13	3377397	3377317	Ser	GCT	0	0	66.7
gi|743637694|gb|AZNF01000002.1|	14	1415782	1415686	Phe	GAA	1415745	1415722	63.2
gi|743636528|gb|AZNF01000003.1|	1	239788	239859	Thr	AGT	0	0	81.9
gi|743636528|gb|AZNF01000003.1|	2	1146105	1146197	Arg	TCG	1146142	1146161	59.0
gi|743636528|gb|AZNF01000003.1|	3	3061011	3060915	Ala	AGC	3060975	3060951	64.8
gi|743636528|gb|AZNF01000003.1|	4	3025929	3025823	Ala	CGC	3025892	3025859	61.7
gi|743636528|gb|AZNF01000003.1|	5	2919832	2919749	Lys	CTT	2919795	2919785	78.3
gi|743636528|gb|AZNF01000003.1|	6	2914759	2914686	Val	AAC	0	0	76.4
gi|743636528|gb|AZNF01000003.1|	7	2544002	2543878	iMet	CAT	0	0	29.4	pseudo
gi|743636528|gb|AZNF01000003.1|	8	2025900	2025828	Lys	TTT	0	0	80.7
gi|743636528|gb|AZNF01000003.1|	9	1564821	1564749	Arg	TCT	0	0	74.2
gi|743636528|gb|AZNF01000003.1|	10	1482896	1482815	Val	CAC	1482859	1482850	53.8
gi|743636528|gb|AZNF01000003.1|	11	854989	854898	Gln	TTG	854952	854933	53.2
gi|743635620|gb|AZNF01000004.1|	1	411010	411081	Gln	CTG	0	0	58.7
gi|743635620|gb|AZNF01000004.1|	2	628718	628791	Val	AAC	0	0	76.4
gi|743635620|gb|AZNF01000004.1|	3	751833	751914	Gly	GCC	751869	751879	58.9
gi|743635620|gb|AZNF01000004.1|	4	751951	752030	Gly	GCC	751987	751995	58.9
gi|743635620|gb|AZNF01000004.1|	5	1340684	1340787	Pro	TGG	1340720	1340751	67.1
gi|743635620|gb|AZNF01000004.1|	6	1619460	1619543	Ile	AAT	1619498	1619507	77.7
gi|743635620|gb|AZNF01000004.1|	7	2729757	2729873	Leu	CAA	2729795	2729829	53.1
gi|743635620|gb|AZNF01000004.1|	8	826188	826117	iMet	CAT	0	0	68.0
gi|743635620|gb|AZNF01000004.1|	9	515596	515488	Leu	TAG	515559	515533	70.1
gi|743635620|gb|AZNF01000004.1|	10	221066	220958	Arg	ACG	221030	220994	45.9
gi|743634851|gb|AZNF01000005.1|	1	144424	144505	Gly	GCC	144460	144470	58.9
gi|743634851|gb|AZNF01000005.1|	2	207993	208091	Leu	AAG	208031	208047	60.1
gi|743634851|gb|AZNF01000005.1|	3	1743646	1743717	Glu	CTC	0	0	56.5
gi|743634851|gb|AZNF01000005.1|	4	1353028	1352925	Arg	ACG	1352992	1352961	69.1
gi|743634118|gb|AZNF01000006.1|	1	602101	602189	His	GTG	602138	602154	53.4
gi|743634118|gb|AZNF01000006.1|	2	1026185	1026258	Val	AAC	0	0	76.4
gi|743634118|gb|AZNF01000006.1|	3	19464	19367	Phe	GAA	19427	19403	63.4
gi|743633372|gb|AZNF01000007.1|	1	719114	719187	Asn	GTT	0	0	72.6
gi|743633372|gb|AZNF01000007.1|	2	919115	919205	Trp	CCA	919151	919169	56.7
gi|743633372|gb|AZNF01000007.1|	3	1591647	1591718	Gly	TCC	0	0	57.2
gi|743633372|gb|AZNF01000007.1|	4	1606864	1606935	Asp	GTC	0	0	69.5
gi|743633372|gb|AZNF01000007.1|	5	1721626	1721698	Arg	TCT	0	0	74.2
gi|743633372|gb|AZNF01000007.1|	6	779382	779311	Gln	CTG	0	0	58.7
gi|743633372|gb|AZNF01000007.1|	7	718240	718167	Asn	GTT	0	0	71.5
gi|743633372|gb|AZNF01000007.1|	8	718090	717957	Asn	GTT	718052	717995	49.2
gi|743633372|gb|AZNF01000007.1|	9	717883	717810	Asn	GTT	0	0	72.6
gi|743633372|gb|AZNF01000007.1|	10	187493	187384	Met	CAT	187454	187420	77.2
gi|743633372|gb|AZNF01000007.1|	11	145297	145216	Ser	AGA	0	0	73.5
gi|743632811|gb|AZNF01000008.1|	1	689296	689411	Leu	CAA	689334	689367	53.1
gi|743632811|gb|AZNF01000008.1|	2	783020	783091	Gly	TCC	0	0	57.2
gi|743632811|gb|AZNF01000008.1|	3	923789	923687	Arg	ACG	923753	923723	69.1
gi|743632270|gb|AZNF01000009.1|	1	325832	325931	Leu	AAG	325870	325887	60.1
gi|743632270|gb|AZNF01000009.1|	2	1217391	1217305	Arg	TCG	1217354	1217341	59.2
gi|743632270|gb|AZNF01000009.1|	3	650152	650051	Ser	CGA	650115	650095	65.5
gi|743631654|gb|AZNF01000010.1|	1	329818	329904	Tyr	GTA	329857	329868	65.5
gi|743631654|gb|AZNF01000010.1|	2	316223	316118	Ile	TAT	316186	316154	63.3
gi|743631134|gb|AZNF01000011.1|	1	131282	131379	Arg	TCT	131319	131344	48.4
gi|743631134|gb|AZNF01000011.1|	2	1117655	1117561	Arg	ACG	1117619	1117597	69.4
gi|743631134|gb|AZNF01000011.1|	3	554321	554250	Asp	GTC	0	0	69.5
gi|743631134|gb|AZNF01000011.1|	4	531941	531861	Ser	AGA	0	0	75.5
gi|743631134|gb|AZNF01000011.1|	5	530757	530677	Ser	AGA	0	0	75.5
gi|743631134|gb|AZNF01000011.1|	6	472809	472719	Pro	AGG	472773	472755	67.5
gi|743630735|gb|AZNF01000012.1|	1	915575	915659	Lys	CTT	915612	915623	78.2
gi|743630735|gb|AZNF01000012.1|	2	955893	955822	Thr	AGT	0	0	81.9
gi|743630392|gb|AZNF01000013.1|	1	21629	21708	Thr	TGT	21665	21672	73.3
gi|743630392|gb|AZNF01000013.1|	2	712300	712406	Arg	CCG	712336	712371	64.8
gi|743630110|gb|AZNF01000014.1|	1	763559	763643	Lys	CTT	763596	763607	78.2
gi|743630110|gb|AZNF01000014.1|	2	451208	451128	Ser	CGA	0	0	75.3
gi|743629805|gb|AZNF01000015.1|	1	222781	222874	Arg	ACG	222817	222838	69.4
gi|743629805|gb|AZNF01000015.1|	2	266554	266467	Glu	TTC	266517	266502	56.1
gi|743629543|gb|AZNF01000016.1|	1	90287	90394	Arg	ACG	90323	90358	59.6
gi|743629543|gb|AZNF01000016.1|	2	325692	325763	Asp	GTC	0	0	69.5
gi|743629543|gb|AZNF01000016.1|	3	650309	650399	Tyr	GTA	650348	650363	60.2
gi|743629543|gb|AZNF01000016.1|	4	526945	526874	Asp	GTC	0	0	69.5
gi|743629318|gb|AZNF01000017.1|	1	198216	198307	Ala	AGC	198252	198271	65.0
gi|743629318|gb|AZNF01000017.1|	2	198445	198537	Ala	AGC	198481	198501	59.9
gi|743629318|gb|AZNF01000017.1|	3	494753	494824	Thr	CGT	0	0	55.0
gi|743629082|gb|AZNF01000018.1|	1	93043	93139	Phe	GAA	93080	93103	63.4
gi|743629082|gb|AZNF01000018.1|	2	204606	204703	Phe	GAA	204643	204667	63.1
gi|743629082|gb|AZNF01000018.1|	3	506397	506502	Arg	ACG	506433	506466	69.0
gi|743629082|gb|AZNF01000018.1|	4	523678	523607	Arg	CCT	0	0	70.9
gi|743628871|gb|AZNF01000019.1|	1	160743	160847	Arg	ACG	160779	160811	51.3
gi|743628871|gb|AZNF01000019.1|	2	493565	493663	Leu	AAG	493603	493619	60.1
gi|743628871|gb|AZNF01000019.1|	3	494228	494330	Leu	AAG	494266	494286	59.9
gi|743628871|gb|AZNF01000019.1|	4	377768	377675	Val	TAC	377730	377711	70.8
gi|743628871|gb|AZNF01000019.1|	5	259248	259175	Val	AAC	0	0	76.4
gi|743628871|gb|AZNF01000019.1|	6	120692	120611	Gly	GCC	120656	120646	58.1
gi|743628612|gb|AZNF01000021.1|	1	254773	254844	Thr	CGT	0	0	69.9
gi|743628491|gb|AZNF01000022.1|	1	298770	298866	Leu	TAA	298807	298829	53.7
gi|743628491|gb|AZNF01000022.1|	2	223607	223536	Gly	CCC	0	0	71.3
gi|743628378|gb|AZNF01000023.1|	1	38713	38615	Ala	AGC	38677	38651	59.8
gi|743628272|gb|AZNF01000024.1|	1	54156	54085	Thr	AGT	0	0	79.2
gi|743628272|gb|AZNF01000024.1|	2	2534	2442	Ala	CGC	2498	2478	65.2
gi|743627965|gb|AZNF01000028.1|	1	129810	129883	Arg	CCG	0	0	52.2
gi|743627965|gb|AZNF01000028.1|	2	132590	132492	Phe	GAA	132553	132528	62.0
gi|743627965|gb|AZNF01000028.1|	3	77003	76920	Ile	AAT	76965	76956	77.7
gi|743627793|gb|AZNF01000031.1|	1	10108	10228	Ser	AGA	10160	10171	22.5
gi|743627793|gb|AZNF01000031.1|	2	98295	98206	Pro	AGG	98259	98242	67.5
gi|743627793|gb|AZNF01000031.1|	3	76675	76592	Ile	AAT	76637	76628	77.7
gi|743627718|gb|AZNF01000034.1|	1	1047	1117	Arg	TCT	0	0	63.3
gi|743627718|gb|AZNF01000034.1|	2	7005	7078	Asp	GTC	0	0	31.2
gi|743627718|gb|AZNF01000034.1|	3	7173	7243	Asn	GTT	0	0	61.2
gi|743627718|gb|AZNF01000034.1|	4	8126	8196	Gly	TCC	0	0	41.0	pseudo
gi|743627718|gb|AZNF01000034.1|	5	9012	9084	Val	TAC	0	0	48.7
gi|743627718|gb|AZNF01000034.1|	6	9186	9272	Gln	TTG	9224	9237	36.7	pseudo
gi|743627718|gb|AZNF01000034.1|	7	9286	9357	Sup	TCA	0	0	32.0	pseudo
gi|743627718|gb|AZNF01000034.1|	8	10884	10956	Pro	TGG	0	0	42.1
gi|743627718|gb|AZNF01000034.1|	9	15733	15803	Thr	TGT	0	0	30.4	pseudo
gi|743627718|gb|AZNF01000034.1|	10	15809	15881	Glu	TTC	0	0	53.5
gi|743627718|gb|AZNF01000034.1|	11	15983	16055	Met	CAT	0	0	34.8	pseudo
gi|743627718|gb|AZNF01000034.1|	12	16056	16138	Leu	TAA	0	0	44.0
gi|743627718|gb|AZNF01000034.1|	13	16146	16217	Ala	TGC	0	0	36.4	pseudo
gi|743627718|gb|AZNF01000034.1|	14	16221	16293	Phe	GAA	0	0	43.1
gi|743627718|gb|AZNF01000034.1|	15	16297	16369	Lys	TTT	0	0	50.4
gi|743627718|gb|AZNF01000034.1|	16	16537	16609	His	GTG	0	0	43.7
gi|743627718|gb|AZNF01000034.1|	17	16615	16686	Met	CAT	0	0	44.1
gi|743627718|gb|AZNF01000034.1|	18	26030	26100	Arg	TCT	0	0	63.3
gi|743627718|gb|AZNF01000034.1|	19	31988	32061	Asp	GTC	0	0	31.2
gi|743627718|gb|AZNF01000034.1|	20	32156	32226	Asn	GTT	0	0	61.2
gi|743627718|gb|AZNF01000034.1|	21	33109	33179	Gly	TCC	0	0	41.0	pseudo
gi|743627718|gb|AZNF01000034.1|	22	33995	34067	Val	TAC	0	0	48.7
gi|743627718|gb|AZNF01000034.1|	23	34169	34255	Gln	TTG	34207	34220	36.7	pseudo
gi|743627718|gb|AZNF01000034.1|	24	34269	34340	Sup	TCA	0	0	32.0	pseudo
gi|743627718|gb|AZNF01000034.1|	25	35867	35939	Pro	TGG	0	0	42.1
gi|743627718|gb|AZNF01000034.1|	26	40716	40786	Thr	TGT	0	0	30.4	pseudo
gi|743627718|gb|AZNF01000034.1|	27	40792	40864	Glu	TTC	0	0	53.5
gi|743627718|gb|AZNF01000034.1|	28	40966	41038	Met	CAT	0	0	34.8	pseudo
gi|743627718|gb|AZNF01000034.1|	29	41039	41121	Leu	TAA	0	0	44.0
gi|743627718|gb|AZNF01000034.1|	30	41129	41200	Ala	TGC	0	0	36.4	pseudo
gi|743627718|gb|AZNF01000034.1|	31	41204	41276	Phe	GAA	0	0	43.1
gi|743627718|gb|AZNF01000034.1|	32	41280	41352	Lys	TTT	0	0	50.4
gi|743627718|gb|AZNF01000034.1|	33	41520	41592	His	GTG	0	0	43.7
gi|743627718|gb|AZNF01000034.1|	34	41598	41669	Met	CAT	0	0	44.1

## Sheet: ManiE_tRNAout
Sequence		tRNA	Bounds	tRNA	Anti	Intron Bounds		Inf
Name	tRNA #	Begin	End	Type	Codon	Begin	End	Score	Note
--------	------	-----	------	----	-----	-----	----	------	------
gi|672386068|gb|JNNZ01000001.1|	1	208989	209084	Ala	AGC	209025	209048	64.8
gi|672386068|gb|JNNZ01000001.1|	2	57907	57836	Gln	CTG	0	0	53.0
gi|672385482|gb|JNNZ01000005.1|	1	465278	465349	Glu	CTC	0	0	56.5
gi|672385482|gb|JNNZ01000005.1|	2	74534	74431	Arg	ACG	74498	74467	69.1
gi|672385163|gb|JNNZ01000007.1|	1	458374	458283	Ala	AGC	458338	458319	65.0
gi|672385163|gb|JNNZ01000007.1|	2	458145	458053	Ala	AGC	458109	458089	59.9
gi|672385163|gb|JNNZ01000007.1|	3	161844	161773	Thr	CGT	0	0	55.0
gi|672385012|gb|JNNZ01000008.1|	1	359409	359493	Lys	CTT	359446	359457	78.2
gi|672385012|gb|JNNZ01000008.1|	2	238804	238721	Ile	AAT	238766	238757	77.7
gi|672384921|gb|JNNZ01000009.1|	1	206780	206851	Gln	CTG	0	0	58.7
gi|672384921|gb|JNNZ01000009.1|	2	311444	311336	Leu	TAG	311407	311381	70.1
gi|672384921|gb|JNNZ01000009.1|	3	16711	16603	Arg	ACG	16675	16639	45.9
gi|672384831|gb|JNNZ01000011.1|	1	53992	53921	Thr	CGT	0	0	69.9
gi|672384686|gb|JNNZ01000012.1|	1	283135	283036	Leu	AAG	283097	283080	60.1
gi|672384582|gb|JNNZ01000013.1|	1	60316	60192	iMet	CAT	0	0	29.4	pseudo
gi|672384390|gb|JNNZ01000014.1|	1	223590	223684	Arg	ACG	223626	223648	69.4
gi|672384339|gb|JNNZ01000015.1|	1	19314	19385	Thr	AGT	0	0	79.2
gi|672384339|gb|JNNZ01000015.1|	2	70965	71057	Ala	CGC	71001	71021	65.2
gi|672384339|gb|JNNZ01000015.1|	3	109155	109275	Ser	AGA	109207	109218	22.5
gi|672384339|gb|JNNZ01000015.1|	4	197371	197282	Pro	AGG	197335	197318	67.5
gi|672384339|gb|JNNZ01000015.1|	5	175752	175669	Ile	AAT	175714	175705	77.7
gi|672384151|gb|JNNZ01000018.1|	1	168627	168714	Glu	TTC	168664	168679	56.1
gi|672384007|gb|JNNZ01000019.1|	1	35053	35125	Arg	TCT	0	0	74.2
gi|672384007|gb|JNNZ01000019.1|	2	118730	118811	Val	CAC	118767	118776	53.8
gi|672384007|gb|JNNZ01000019.1|	3	455265	455173	Arg	TCG	455228	455209	59.0
gi|672383962|gb|JNNZ01000020.1|	1	104050	103960	Tyr	GTA	104011	103996	60.2
gi|672383869|gb|JNNZ01000023.1|	1	44135	44206	Gly	TCC	0	0	57.2
gi|672383869|gb|JNNZ01000023.1|	2	59351	59422	Asp	GTC	0	0	69.5
gi|672383826|gb|JNNZ01000024.1|	1	42741	42657	Lys	CTT	42704	42693	78.2
gi|672383649|gb|JNNZ01000027.1|	1	228927	228824	Pro	TGG	228891	228860	67.1
gi|672383563|gb|JNNZ01000028.1|	1	100068	100149	Gly	GCC	100104	100114	58.1
gi|672383563|gb|JNNZ01000028.1|	2	167314	167404	Pro	AGG	167350	167368	67.5
gi|672383415|gb|JNNZ01000030.1|	1	1944	2041	Leu	TAA	1982	1997	61.8
gi|672383415|gb|JNNZ01000030.1|	2	33245	33326	Gly	GCC	33281	33291	58.1
gi|672383415|gb|JNNZ01000030.1|	3	101432	101512	Ser	GCT	0	0	66.7
gi|672383415|gb|JNNZ01000030.1|	4	103038	102958	Ser	GCT	0	0	66.7
gi|672383415|gb|JNNZ01000030.1|	5	42091	41985	Ser	GCT	42054	42029	61.9
gi|672383329|gb|JNNZ01000032.1|	1	86898	86970	Lys	TTT	0	0	80.7
gi|672383252|gb|JNNZ01000033.1|	1	93159	93255	Phe	GAA	93196	93219	63.4
gi|672383252|gb|JNNZ01000033.1|	2	204717	204814	Phe	GAA	204754	204778	63.1
gi|672382860|gb|JNNZ01000037.1|	1	50587	50670	Ile	AAT	50625	50634	77.7
gi|672382701|gb|JNNZ01000039.1|	1	335829	335758	Asp	GTC	0	0	69.5
gi|672382701|gb|JNNZ01000039.1|	2	313443	313363	Ser	AGA	0	0	75.5
gi|672382701|gb|JNNZ01000039.1|	3	312259	312179	Ser	AGA	0	0	75.5
gi|672382701|gb|JNNZ01000039.1|	4	254311	254221	Pro	AGG	254275	254257	67.5
gi|672382534|gb|JNNZ01000042.1|	1	22210	22301	Gln	TTG	22247	22266	53.2
gi|672382297|gb|JNNZ01000048.1|	1	150397	150494	Arg	TCT	150434	150459	48.4
gi|672382202|gb|JNNZ01000049.1|	1	121654	121750	Ala	AGC	121690	121714	64.8
gi|672382202|gb|JNNZ01000049.1|	2	156061	156167	Ala	CGC	156098	156131	61.7
gi|672382202|gb|JNNZ01000049.1|	3	262179	262262	Lys	CTT	262216	262226	78.3
gi|672382202|gb|JNNZ01000049.1|	4	267251	267324	Val	AAC	0	0	76.4
gi|672382126|gb|JNNZ01000052.1|	1	75327	75424	Phe	GAA	75364	75388	63.4
gi|672381690|gb|JNNZ01000095.1|	1	106277	106205	Ala	TGC	0	0	64.5
gi|672381690|gb|JNNZ01000095.1|	2	15841	15740	Pro	CGG	15805	15776	61.6
gi|672381601|gb|JNNZ01000097.1|	1	270882	270800	His	GTG	270845	270835	53.8
gi|672381601|gb|JNNZ01000097.1|	2	270739	270655	His	GTG	270702	270690	53.6
gi|672381346|gb|JNNZ01000102.1|	1	521649	521517	Ser	TGA	521612	521561	56.3
gi|672381346|gb|JNNZ01000102.1|	2	52997	52926	Thr	AGT	0	0	81.9
gi|672380978|gb|JNNZ01000111.1|	1	61047	60975	Ala	TGC	0	0	61.0
gi|672380740|gb|JNNZ01000114.1|	1	134206	134292	Tyr	GTA	134245	134256	65.5
gi|672380740|gb|JNNZ01000114.1|	2	174451	174522	Asp	GTC	0	0	69.5
gi|672380596|gb|JNNZ01000115.1|	1	279980	280051	iMet	CAT	0	0	68.0
gi|672380596|gb|JNNZ01000115.1|	2	477520	477447	Val	AAC	0	0	76.4
gi|672380596|gb|JNNZ01000115.1|	3	354400	354319	Gly	GCC	354364	354354	58.9
gi|672380596|gb|JNNZ01000115.1|	4	354282	354203	Gly	GCC	354246	354238	58.9
gi|672380331|gb|JNNZ01000122.1|	1	696332	696405	Asn	GTT	0	0	72.6
gi|672380331|gb|JNNZ01000122.1|	2	896339	896429	Trp	CCA	896375	896393	56.7
gi|672380331|gb|JNNZ01000122.1|	3	756637	756566	Gln	CTG	0	0	58.7
gi|672380331|gb|JNNZ01000122.1|	4	695458	695385	Asn	GTT	0	0	71.5
gi|672380331|gb|JNNZ01000122.1|	5	695307	695174	Asn	GTT	695269	695212	49.2
gi|672380331|gb|JNNZ01000122.1|	6	695101	695028	Asn	GTT	0	0	72.6
gi|672380331|gb|JNNZ01000122.1|	7	163558	163449	Met	CAT	163519	163485	77.2
gi|672380331|gb|JNNZ01000122.1|	8	121367	121286	Ser	AGA	0	0	73.5
gi|672380064|gb|JNNZ01000124.1|	1	206395	206466	Thr	AGT	0	0	81.9
gi|672380064|gb|JNNZ01000124.1|	2	246689	246605	Lys	CTT	246652	246641	78.2
gi|672379959|gb|JNNZ01000126.1|	1	40910	40803	Arg	ACG	40874	40839	59.6
gi|672379727|gb|JNNZ01000127.1|	1	69304	69387	Ile	AAT	69342	69351	77.7
gi|672379727|gb|JNNZ01000127.1|	2	116152	116056	Phe	GAA	116115	116092	63.2
gi|672379687|gb|JNNZ01000128.1|	1	57757	57862	Arg	ACG	57793	57826	69.0
gi|672379687|gb|JNNZ01000128.1|	2	76351	76280	Arg	CCT	0	0	70.9
gi|672379340|gb|JNNZ01000133.1|	1	222150	222079	Thr	AGT	0	0	81.9
gi|672379130|gb|JNNZ01000138.1|	1	184141	184213	Cys	GCA	0	0	76.1
gi|672379130|gb|JNNZ01000138.1|	2	182863	182791	Cys	GCA	0	0	75.7
gi|672379066|gb|JNNZ01000139.1|	1	159019	159113	Glu	CTC	159056	159078	48.8
gi|672378741|gb|JNNZ01000147.1|	1	224205	224132	Val	AAC	0	0	76.4
gi|672378698|gb|JNNZ01000148.1|	1	122805	122717	His	GTG	122768	122752	53.4
gi|672378639|gb|JNNZ01000151.1|	1	74661	74770	Met	CAT	74700	74734	77.2
gi|672378331|gb|JNNZ01000161.1|	1	23575	23491	Lys	CTT	23538	23527	78.2
gi|672378276|gb|JNNZ01000163.1|	1	57347	57459	Leu	CAG	57385	57415	58.6
gi|672378276|gb|JNNZ01000163.1|	2	84095	84177	Trp	CCA	84131	84141	49.5
gi|672378276|gb|JNNZ01000163.1|	3	9808	9699	Leu	CAG	9770	9743	58.7
gi|672378073|gb|JNNZ01000173.1|	1	52975	53056	Gly	GCC	53011	53021	58.9
gi|672378073|gb|JNNZ01000173.1|	2	116540	116638	Leu	AAG	116578	116594	60.1
gi|672377910|gb|JNNZ01000178.1|	1	7813	7697	Leu	CAA	7775	7741	53.1
gi|672377805|gb|JNNZ01000181.1|	1	97068	97139	Glu	CTC	0	0	56.5
gi|672377663|gb|JNNZ01000184.1|	1	179995	180086	Glu	TTC	180032	180051	50.6
gi|672377628|gb|JNNZ01000185.1|	1	80829	80922	Arg	ACG	80865	80886	69.4
gi|672377414|gb|JNNZ01000188.1|	1	30299	30370	Asp	GTC	0	0	69.5
gi|672377383|gb|JNNZ01000189.1|	1	9887	9816	Asp	GTC	0	0	69.5
gi|672377016|gb|JNNZ01000194.1|	1	40563	40643	Ser	CGA	0	0	75.3
gi|672376889|gb|JNNZ01000198.1|	1	1143	1241	Phe	GAA	1180	1205	62.0
gi|672376871|gb|JNNZ01000199.1|	1	45519	45614	Glu	CTC	45556	45579	51.3
gi|672376748|gb|JNNZ01000202.1|	1	239400	239481	Gly	GCC	239436	239446	58.1
gi|672376654|gb|JNNZ01000204.1|	1	158700	158805	Ile	TAT	158737	158769	63.3
gi|672376654|gb|JNNZ01000204.1|	2	145107	145021	Tyr	GTA	145068	145057	65.5
gi|672376386|gb|JNNZ01000210.1|	1	17262	17147	Leu	CAA	17224	17191	53.1
gi|672376350|gb|JNNZ01000212.1|	1	53080	52974	Arg	CCG	53044	53009	64.8
gi|672376249|gb|JNNZ01000215.1|	1	127839	127943	Arg	ACG	127875	127907	63.1
gi|672376161|gb|JNNZ01000219.1|	1	30000	30072	Arg	TCT	0	0	74.2
gi|672376067|gb|JNNZ01000220.1|	1	148571	148675	Arg	ACG	148607	148639	51.3
gi|672376067|gb|JNNZ01000220.1|	2	247062	246989	Val	AAC	0	0	76.4
gi|672376067|gb|JNNZ01000220.1|	3	108526	108445	Gly	GCC	108490	108480	58.1
gi|672376035|gb|JNNZ01000222.1|	1	22694	22773	Thr	TGT	22730	22737	73.3
gi|672375912|gb|JNNZ01000227.1|	1	1667	1596	Gly	CCC	0	0	71.3
gi|672375898|gb|JNNZ01000228.1|	1	27101	27197	Leu	TAA	27138	27160	53.7
gi|672375857|gb|JNNZ01000229.1|	1	28890	28792	Ala	AGC	28854	28828	59.8
gi|672375622|gb|JNNZ01000237.1|	1	248431	248524	Val	TAC	248469	248488	70.8
gi|672375622|gb|JNNZ01000237.1|	2	132594	132496	Leu	AAG	132556	132540	60.1
gi|672375622|gb|JNNZ01000237.1|	3	131932	131830	Leu	AAG	131894	131874	59.9
gi|672375424|gb|JNNZ01000244.1|	1	68299	68397	Phe	GAA	68336	68361	62.0
gi|672375424|gb|JNNZ01000244.1|	2	123877	123960	Ile	AAT	123915	123924	77.7
gi|672375424|gb|JNNZ01000244.1|	3	71079	71006	Arg	CCG	0	0	52.2
gi|672375391|gb|JNNZ01000248.1|	1	28805	28734	Gly	TCC	0	0	57.2
gi|672375347|gb|JNNZ01000252.1|	1	4640	4539	Ser	CGA	4603	4583	65.5
gi|672375212|gb|JNNZ01000262.1|	1	15750	15664	Arg	TCG	15713	15700	59.2
gi|672375155|gb|JNNZ01000276.1|	1	21650	21580	Thr	TGT	0	0	30.4	pseudo
gi|672375155|gb|JNNZ01000276.1|	2	21574	21502	Glu	TTC	0	0	53.5
gi|672375155|gb|JNNZ01000276.1|	3	21400	21328	Met	CAT	0	0	34.8	pseudo
gi|672375155|gb|JNNZ01000276.1|	4	21327	21245	Leu	TAA	0	0	44.0
gi|672375155|gb|JNNZ01000276.1|	5	21237	21166	Ala	TGC	0	0	36.4	pseudo
gi|672375155|gb|JNNZ01000276.1|	6	21162	21090	Phe	GAA	0	0	43.1
gi|672375155|gb|JNNZ01000276.1|	7	21086	21014	Lys	TTT	0	0	50.4
gi|672375155|gb|JNNZ01000276.1|	8	20846	20774	His	GTG	0	0	43.7
gi|672375155|gb|JNNZ01000276.1|	9	20768	20697	Met	CAT	0	0	44.1
gi|672375155|gb|JNNZ01000276.1|	10	11363	11293	Arg	TCT	0	0	63.3
gi|672375155|gb|JNNZ01000276.1|	11	5406	5333	Asp	GTC	0	0	31.2
gi|672375155|gb|JNNZ01000276.1|	12	5238	5168	Asn	GTT	0	0	61.2
gi|672375155|gb|JNNZ01000276.1|	13	4285	4215	Gly	TCC	0	0	41.0	pseudo
gi|672375155|gb|JNNZ01000276.1|	14	3399	3327	Val	TAC	0	0	48.7
gi|672375155|gb|JNNZ01000276.1|	15	3225	3139	Gln	TTG	3187	3174	36.7	pseudo
gi|672375155|gb|JNNZ01000276.1|	16	3125	3054	Sup	TCA	0	0	32.0	pseudo
gi|672375155|gb|JNNZ01000276.1|	17	1527	1455	Pro	TGG	0	0	42.1
gi|672375014|gb|JNNZ01000365.1|	1	86566	86668	Arg	ACG	86602	86632	69.1

## Sheet: Mbru_tRNAout
Sequence		tRNA	Bounds	tRNA	Anti	Intron Bounds		Inf
Name	tRNA #	Begin	End	Type	Codon	Begin	End	Score	Note
--------	------	-----	------	----	-----	-----	----	------	------
gi|743647662|gb|AZNG01000001.1|	1	124419	124531	Leu	CAG	124457	124487	58.6
gi|743647662|gb|AZNG01000001.1|	2	151431	151513	Trp	CCA	151467	151477	49.5
gi|743647662|gb|AZNG01000001.1|	3	206296	206405	Leu	CAG	206334	206361	58.7
gi|743647662|gb|AZNG01000001.1|	4	318423	318507	Lys	CTT	318460	318471	78.2
gi|743647662|gb|AZNG01000001.1|	5	618201	618284	Ile	AAT	618239	618248	77.7
gi|743647662|gb|AZNG01000001.1|	6	1696034	1696105	Gln	CTG	0	0	53.0
gi|743647662|gb|AZNG01000001.1|	7	2273394	2273481	Glu	TTC	2273431	2273446	56.1
gi|743647662|gb|AZNG01000001.1|	8	2785872	2785943	Thr	AGT	0	0	81.9
gi|743647662|gb|AZNG01000001.1|	9	3685927	3686019	Arg	TCG	3685964	3685983	59.0
gi|743647662|gb|AZNG01000001.1|	10	6918015	6917918	Phe	GAA	6917978	6917954	63.4
gi|743647662|gb|AZNG01000001.1|	11	6889087	6888999	Thr	TGT	6889051	6889035	72.9
gi|743647662|gb|AZNG01000001.1|	12	6199477	6199371	Arg	TCG	6199441	6199406	65.1
gi|743647662|gb|AZNG01000001.1|	13	5580388	5580292	Ala	AGC	5580352	5580328	64.8
gi|743647662|gb|AZNG01000001.1|	14	5546143	5546037	Ala	CGC	5546106	5546073	61.7
gi|743647662|gb|AZNG01000001.1|	15	5440250	5440167	Lys	CTT	5440213	5440203	78.3
gi|743647662|gb|AZNG01000001.1|	16	5435141	5435068	Val	AAC	0	0	76.4
gi|743647662|gb|AZNG01000001.1|	17	4567809	4567737	Lys	TTT	0	0	80.7
gi|743647662|gb|AZNG01000001.1|	18	4107746	4107674	Arg	TCT	0	0	74.2
gi|743647662|gb|AZNG01000001.1|	19	4026239	4026158	Val	CAC	4026202	4026193	53.8
gi|743647662|gb|AZNG01000001.1|	20	3395733	3395642	Gln	TTG	3395696	3395677	53.2
gi|743647662|gb|AZNG01000001.1|	21	2317878	2317785	Arg	ACG	2317842	2317821	69.4
gi|743647662|gb|AZNG01000001.1|	22	1806669	1806598	Thr	AGT	0	0	81.9
gi|743647662|gb|AZNG01000001.1|	23	1545404	1545309	Ala	AGC	1545368	1545345	64.8
gi|743647662|gb|AZNG01000001.1|	24	1222173	1222075	Phe	GAA	1222136	1222111	62.0
gi|743647662|gb|AZNG01000001.1|	25	933848	933776	Ala	TGC	0	0	64.5
gi|743647662|gb|AZNG01000001.1|	26	843683	843583	Pro	CGG	843647	843619	61.7
gi|743647662|gb|AZNG01000001.1|	27	496311	496227	Lys	CTT	496274	496263	78.2
gi|743646596|gb|AZNG01000002.1|	1	112852	112931	Gly	GCC	112888	112896	58.9
gi|743646596|gb|AZNG01000002.1|	2	700727	700830	Pro	TGG	700763	700794	67.1
gi|743646596|gb|AZNG01000002.1|	3	981584	981667	Ile	AAT	981622	981631	77.7
gi|743646596|gb|AZNG01000002.1|	4	3008128	3008212	Lys	CTT	3008165	3008176	78.2
gi|743646596|gb|AZNG01000002.1|	5	3412671	3412762	Ala	AGC	3412707	3412726	65.0
gi|743646596|gb|AZNG01000002.1|	6	3412901	3412993	Ala	AGC	3412937	3412957	59.9
gi|743646596|gb|AZNG01000002.1|	7	3048719	3048648	Thr	AGT	0	0	81.9
gi|743646596|gb|AZNG01000002.1|	8	2034425	2034309	Leu	CAA	2034387	2034353	53.1
gi|743646596|gb|AZNG01000002.1|	9	187455	187384	iMet	CAT	0	0	68.0
gi|743645682|gb|AZNG01000003.1|	1	1066426	1066497	Glu	CTC	0	0	56.5
gi|743645682|gb|AZNG01000003.1|	2	2408686	2408585	Ser	CGA	2408649	2408629	65.5
gi|743645682|gb|AZNG01000003.1|	3	1776919	1776848	Thr	CGT	0	0	69.9
gi|743645682|gb|AZNG01000003.1|	4	1526696	1526597	Leu	AAG	1526658	1526641	60.1
gi|743645682|gb|AZNG01000003.1|	5	676069	675966	Arg	ACG	676033	676002	69.4
gi|743644877|gb|AZNG01000004.1|	1	346022	346094	Cys	GCA	0	0	76.1
gi|743644877|gb|AZNG01000004.1|	2	621906	622000	Glu	CTC	621943	621965	48.8
gi|743644877|gb|AZNG01000004.1|	3	1247625	1247707	His	GTG	1247662	1247672	53.8
gi|743644877|gb|AZNG01000004.1|	4	1247772	1247856	His	GTG	1247809	1247821	53.6
gi|743644877|gb|AZNG01000004.1|	5	344742	344670	Cys	GCA	0	0	75.7
gi|743644877|gb|AZNG01000004.1|	6	77073	76941	Ser	TGA	77036	76985	56.3
gi|743644285|gb|AZNG01000005.1|	1	98441	98512	Thr	CGT	0	0	64.2
gi|743644285|gb|AZNG01000005.1|	2	546302	546400	Ala	AGC	546338	546364	59.8
gi|743644285|gb|AZNG01000005.1|	3	907102	907188	Tyr	GTA	907141	907152	65.5
gi|743644285|gb|AZNG01000005.1|	4	894016	893911	Ile	TAT	893979	893947	63.3
gi|743643735|gb|AZNG01000006.1|	1	293943	294014	Gln	CTG	0	0	58.7
gi|743643735|gb|AZNG01000006.1|	2	355664	355737	Asn	GTT	0	0	71.5
gi|743643735|gb|AZNG01000006.1|	3	355815	355948	Asn	GTT	355853	355910	49.2
gi|743643735|gb|AZNG01000006.1|	4	356023	356096	Asn	GTT	0	0	72.6
gi|743643735|gb|AZNG01000006.1|	5	884242	884351	Met	CAT	884281	884315	77.2
gi|743643735|gb|AZNG01000006.1|	6	926550	926631	Ser	AGA	0	0	73.5
gi|743643735|gb|AZNG01000006.1|	7	1292036	1292129	Val	TAC	1292074	1292093	70.8
gi|743643735|gb|AZNG01000006.1|	8	1411002	1411075	Val	AAC	0	0	76.4
gi|743643735|gb|AZNG01000006.1|	9	1549045	1549126	Gly	GCC	1549081	1549091	58.1
gi|743643735|gb|AZNG01000006.1|	10	1679941	1680059	Undet	NNN	0	0	43.7
gi|743643735|gb|AZNG01000006.1|	11	1807217	1807146	Thr	AGT	0	0	79.2
gi|743643735|gb|AZNG01000006.1|	12	1756895	1756806	Pro	AGG	1756859	1756842	67.5
gi|743643735|gb|AZNG01000006.1|	13	1735564	1735481	Ile	AAT	1735526	1735517	77.7
gi|743643735|gb|AZNG01000006.1|	14	1661438	1661341	Ala	CGC	1661402	1661377	61.4
gi|743643735|gb|AZNG01000006.1|	15	1509463	1509359	Arg	ACG	1509427	1509395	58.8
gi|743643735|gb|AZNG01000006.1|	16	1176188	1176090	Leu	AAG	1176150	1176134	60.1
gi|743643735|gb|AZNG01000006.1|	17	1175526	1175424	Leu	AAG	1175488	1175468	59.9
gi|743643735|gb|AZNG01000006.1|	18	354796	354723	Asn	GTT	0	0	72.6
gi|743643735|gb|AZNG01000006.1|	19	151524	151434	Trp	CCA	151488	151470	56.8
gi|743643255|gb|AZNG01000007.1|	1	1174194	1174265	Gly	CCC	0	0	71.3
gi|743643255|gb|AZNG01000007.1|	2	1479891	1479987	Phe	GAA	1479928	1479951	63.4
gi|743643255|gb|AZNG01000007.1|	3	1597812	1597909	Phe	GAA	1597849	1597873	63.1
gi|743643255|gb|AZNG01000007.1|	4	1094025	1093929	Leu	TAA	1093988	1093966	53.7
gi|743643255|gb|AZNG01000007.1|	5	846767	846673	Arg	ACG	846731	846709	69.7
gi|743643255|gb|AZNG01000007.1|	6	283909	283838	Asp	GTC	0	0	69.5
gi|743643255|gb|AZNG01000007.1|	7	260909	260829	Ser	AGA	0	0	75.5
gi|743643255|gb|AZNG01000007.1|	8	259581	259501	Ser	AGA	0	0	75.5
gi|743643255|gb|AZNG01000007.1|	9	199478	199388	Pro	AGG	199442	199424	67.5
gi|743642893|gb|AZNG01000008.1|	1	272514	272595	Gly	GCC	272550	272560	58.1
gi|743642893|gb|AZNG01000008.1|	2	401925	402006	Gly	GCC	401961	401971	58.1
gi|743642893|gb|AZNG01000008.1|	3	489006	489096	Pro	AGG	489042	489060	67.5
gi|743642893|gb|AZNG01000008.1|	4	657363	657458	Glu	CTC	657400	657423	51.3
gi|743642584|gb|AZNG01000009.1|	1	766899	766970	Gln	CTG	0	0	53.0
gi|743642584|gb|AZNG01000009.1|	2	983408	983481	Val	AAC	0	0	76.4
gi|743642584|gb|AZNG01000009.1|	3	870032	869924	Leu	TAG	869995	869969	70.1
gi|743642584|gb|AZNG01000009.1|	4	575698	575590	Arg	ACG	575662	575626	55.4
gi|743642584|gb|AZNG01000009.1|	5	389159	389052	Arg	ACG	389123	389088	50.7
gi|743642584|gb|AZNG01000009.1|	6	157853	157782	Asp	GTC	0	0	69.5
gi|743641422|gb|AZNG01000013.1|	1	458923	458835	His	GTG	458886	458870	53.4
gi|743641422|gb|AZNG01000013.1|	2	23967	23894	Val	AAC	0	0	76.4
gi|743641221|gb|AZNG01000014.1|	1	89048	89139	Glu	TTC	89085	89104	50.6
gi|743641221|gb|AZNG01000014.1|	2	300899	300996	Leu	TAA	300937	300952	61.8
gi|743641221|gb|AZNG01000014.1|	3	331954	332035	Gly	GCC	331990	332000	58.1
gi|743641221|gb|AZNG01000014.1|	4	399245	399347	Ser	GCT	399282	399303	58.6
gi|743641221|gb|AZNG01000014.1|	5	682967	682896	Glu	CTC	0	0	56.5
gi|743641221|gb|AZNG01000014.1|	6	340535	340429	Ser	GCT	340498	340473	61.9
gi|743641014|gb|AZNG01000015.1|	1	690028	689927	Ser	GCT	689991	689971	58.7
gi|743640817|gb|AZNG01000016.1|	1	511136	511055	Gly	GCC	511100	511090	58.9
gi|743640817|gb|AZNG01000016.1|	2	449146	449048	Leu	AAG	449108	449092	60.1
gi|743640615|gb|AZNG01000017.1|	1	353462	353566	Arg	ACG	353498	353530	52.1
gi|743640615|gb|AZNG01000017.1|	2	519771	519685	Tyr	GTA	519732	519721	65.5
gi|743640615|gb|AZNG01000017.1|	3	479914	479843	Asp	GTC	0	0	69.5
gi|743640615|gb|AZNG01000017.1|	4	200027	199955	Ala	TGC	0	0	61.0
gi|743638877|gb|AZNG01000018.1|	1	87049	87158	Met	CAT	87088	87122	77.2
gi|743638877|gb|AZNG01000018.1|	2	167857	167940	Ile	AAT	167895	167904	77.7
gi|743638877|gb|AZNG01000018.1|	3	214959	214863	Phe	GAA	214922	214899	63.2
gi|743636380|gb|AZNG01000020.1|	1	392255	392341	Arg	TCG	392292	392305	59.2
gi|743634730|gb|AZNG01000022.1|	1	111283	111199	Lys	CTT	111246	111235	78.2
gi|743633980|gb|AZNG01000023.1|	1	339166	339095	Gly	TCC	0	0	57.2
gi|743633980|gb|AZNG01000023.1|	2	326036	325965	Asp	GTC	0	0	69.5
gi|743633273|gb|AZNG01000024.1|	1	211441	211343	Arg	TCT	211404	211379	66.4
gi|743632160|gb|AZNG01000026.1|	1	108851	108953	Arg	ACG	108887	108917	69.1
gi|743632160|gb|AZNG01000026.1|	2	346561	346446	Leu	CAA	346523	346490	53.1
gi|743632160|gb|AZNG01000026.1|	3	252422	252351	Gly	TCC	0	0	57.2
gi|743631576|gb|AZNG01000027.1|	1	128861	128781	Ser	CGA	0	0	75.3
gi|743630068|gb|AZNG01000032.1|	1	124141	124051	Tyr	GTA	124102	124087	60.2
gi|743629495|gb|AZNG01000034.1|	1	40452	40381	Asp	GTC	0	0	69.5
gi|743629275|gb|AZNG01000035.1|	1	50496	50567	Arg	CCT	0	0	66.8
gi|743629275|gb|AZNG01000035.1|	2	61948	61843	Arg	ACG	61912	61879	69.0
gi|743629035|gb|AZNG01000036.1|	1	130827	130900	Arg	CCG	0	0	52.2
gi|743629035|gb|AZNG01000036.1|	2	133580	133482	Phe	GAA	133543	133518	62.0
gi|743629035|gb|AZNG01000036.1|	3	77935	77852	Ile	AAT	77897	77888	77.7
gi|743627941|gb|AZNG01000047.1|	1	49500	49427	Asp	GTC	0	0	31.2
gi|743627941|gb|AZNG01000047.1|	2	49332	49262	Asn	GTT	0	0	61.2
gi|743627941|gb|AZNG01000047.1|	3	48379	48309	Gly	TCC	0	0	41.0	pseudo
gi|743627941|gb|AZNG01000047.1|	4	47493	47421	Val	TAC	0	0	48.7
gi|743627941|gb|AZNG01000047.1|	5	47319	47233	Undet	NNN	0	0	35.4	pseudo
gi|743627941|gb|AZNG01000047.1|	6	47219	47148	Sup	TCA	0	0	32.0	pseudo
gi|743627941|gb|AZNG01000047.1|	7	45620	45548	Pro	TGG	0	0	42.1
gi|743627941|gb|AZNG01000047.1|	8	40771	40701	Thr	TGT	0	0	30.4	pseudo
gi|743627941|gb|AZNG01000047.1|	9	40695	40623	Glu	TTC	0	0	53.5
gi|743627941|gb|AZNG01000047.1|	10	40522	40450	Met	CAT	0	0	34.8	pseudo
gi|743627941|gb|AZNG01000047.1|	11	40449	40367	Leu	TAA	0	0	45.5
gi|743627941|gb|AZNG01000047.1|	12	40357	40286	Ala	TGC	0	0	36.4	pseudo
gi|743627941|gb|AZNG01000047.1|	13	40282	40210	Phe	GAA	0	0	43.1
gi|743627941|gb|AZNG01000047.1|	14	40206	40134	Lys	TTT	0	0	50.4
gi|743627941|gb|AZNG01000047.1|	15	39966	39894	His	GTG	0	0	43.7
gi|743627941|gb|AZNG01000047.1|	16	39888	39817	Met	CAT	0	0	46.5
gi|743627941|gb|AZNG01000047.1|	17	30494	30424	Arg	TCT	0	0	63.3
gi|743627941|gb|AZNG01000047.1|	18	24407	24334	Asp	GTC	0	0	31.2
gi|743627941|gb|AZNG01000047.1|	19	24239	24169	Asn	GTT	0	0	61.2
gi|743627941|gb|AZNG01000047.1|	20	23286	23216	Gly	TCC	0	0	41.0	pseudo
gi|743627941|gb|AZNG01000047.1|	21	22400	22328	Val	TAC	0	0	48.7
gi|743627941|gb|AZNG01000047.1|	22	22226	22140	Undet	NNN	0	0	35.4	pseudo
gi|743627941|gb|AZNG01000047.1|	23	22126	22055	Sup	TCA	0	0	32.0	pseudo
gi|743627941|gb|AZNG01000047.1|	24	20527	20455	Pro	TGG	0	0	42.1
gi|743627941|gb|AZNG01000047.1|	25	15678	15608	Thr	TGT	0	0	30.4	pseudo
gi|743627941|gb|AZNG01000047.1|	26	15602	15530	Glu	TTC	0	0	53.5
gi|743627941|gb|AZNG01000047.1|	27	15429	15357	Met	CAT	0	0	34.8	pseudo
gi|743627941|gb|AZNG01000047.1|	28	15356	15274	Leu	TAA	0	0	45.5
gi|743627941|gb|AZNG01000047.1|	29	15264	15193	Ala	TGC	0	0	36.4	pseudo
gi|743627941|gb|AZNG01000047.1|	30	15189	15117	Phe	GAA	0	0	43.1
gi|743627941|gb|AZNG01000047.1|	31	15113	15041	Lys	TTT	0	0	50.4
gi|743627941|gb|AZNG01000047.1|	32	14873	14801	His	GTG	0	0	43.7
gi|743627941|gb|AZNG01000047.1|	33	14795	14724	Met	CAT	0	0	46.5
gi|743627941|gb|AZNG01000047.1|	34	5401	5331	Arg	TCT	0	0	63.3

## Sheet: Mgui_tRNAout
Sequence		tRNA	Bounds	tRNA	Anti	Intron Bounds		Inf
Name	tRNA #	Begin	End	Type	Codon	Begin	End	Score	Note
--------	------	-----	------	----	-----	-----	----	------	------
gi|743665262|gb|AZNH01000001.1|	1	208613	208684	Thr	AGT	0	0	81.9
gi|743665262|gb|AZNH01000001.1|	2	1224320	1224436	Leu	CAA	1224358	1224392	53.1
gi|743665262|gb|AZNH01000001.1|	3	2557668	2557565	Pro	TGG	2557632	2557601	67.1
gi|743665262|gb|AZNH01000001.1|	4	2278121	2278038	Ile	AAT	2278083	2278074	77.7
gi|743665262|gb|AZNH01000001.1|	5	249139	249055	Lys	CTT	249102	249091	78.2
gi|743664716|gb|AZNH01000002.1|	1	213285	213378	Arg	ACG	213321	213342	69.4
gi|743664716|gb|AZNH01000002.1|	2	734153	734224	Thr	AGT	0	0	81.9
gi|743664716|gb|AZNH01000002.1|	3	995788	995883	Ala	AGC	995824	995847	64.8
gi|743664716|gb|AZNH01000002.1|	4	1327290	1327388	Phe	GAA	1327327	1327352	62.0
gi|743664716|gb|AZNH01000002.1|	5	1621614	1621686	Ala	TGC	0	0	64.5
gi|743664716|gb|AZNH01000002.1|	6	1713172	1713272	Pro	CGG	1713208	1713236	61.7
gi|743664716|gb|AZNH01000002.1|	7	844210	844139	Gln	CTG	0	0	53.0
gi|743664716|gb|AZNH01000002.1|	8	262226	262139	Glu	TTC	262189	262174	56.1
gi|743664170|gb|AZNH01000003.1|	1	1314349	1314454	Ile	TAT	1314386	1314418	63.3
gi|743664170|gb|AZNH01000003.1|	2	1302156	1302070	Tyr	GTA	1302117	1302106	65.5
gi|743663685|gb|AZNH01000004.1|	1	1190492	1190384	Arg	ACG	1190456	1190420	63.5
gi|743663685|gb|AZNH01000004.1|	2	787977	787905	Lys	TTT	0	0	80.7
gi|743663685|gb|AZNH01000004.1|	3	328542	328470	Arg	TCT	0	0	74.2
gi|743663685|gb|AZNH01000004.1|	4	247490	247409	Val	CAC	247453	247444	53.8
gi|743663201|gb|AZNH01000005.1|	1	853656	853550	Arg	CCG	853620	853585	62.3
gi|743663201|gb|AZNH01000005.1|	2	235209	235114	Ala	AGC	235173	235150	64.8
gi|743663201|gb|AZNH01000005.1|	3	200975	200868	Arg	ACG	200939	200904	59.9
gi|743663201|gb|AZNH01000005.1|	4	91572	91489	Lys	CTT	91535	91525	78.3
gi|743663201|gb|AZNH01000005.1|	5	86554	86481	Val	AAC	0	0	76.4
gi|743662812|gb|AZNH01000006.1|	1	627564	627666	Arg	ACG	627600	627630	69.1
gi|743662812|gb|AZNH01000006.1|	2	236430	236359	Glu	CTC	0	0	56.5
gi|743662812|gb|AZNH01000006.1|	3	236242	236171	Glu	CTC	0	0	56.5
gi|743662462|gb|AZNH01000007.1|	1	98836	98945	Met	CAT	98875	98909	77.2
gi|743662462|gb|AZNH01000007.1|	2	140992	141073	Ser	AGA	0	0	73.5
gi|743662462|gb|AZNH01000007.1|	3	511446	511539	Val	TAC	511484	511503	70.8
gi|743662462|gb|AZNH01000007.1|	4	629735	629808	Val	AAC	0	0	76.4
gi|743662462|gb|AZNH01000007.1|	5	767809	767890	Gly	GCC	767845	767855	58.1
gi|743662462|gb|AZNH01000007.1|	6	896300	896425	Undet	NNN	0	0	40.4
gi|743662462|gb|AZNH01000007.1|	7	1029776	1029705	Thr	AGT	0	0	79.2
gi|743662462|gb|AZNH01000007.1|	8	979386	979297	Pro	AGG	979350	979333	67.5
gi|743662462|gb|AZNH01000007.1|	9	957751	957668	Ile	AAT	957713	957704	77.7
gi|743662462|gb|AZNH01000007.1|	10	881659	881562	Ala	CGC	881623	881598	61.4
gi|743662462|gb|AZNH01000007.1|	11	727929	727825	Arg	ACG	727893	727861	54.5
gi|743662462|gb|AZNH01000007.1|	12	394683	394585	Leu	AAG	394645	394629	60.1
gi|743662462|gb|AZNH01000007.1|	13	394018	393916	Leu	AAG	393980	393960	59.9
gi|743662138|gb|AZNH01000008.1|	1	501266	501346	Ser	GCT	0	0	66.7
gi|743662138|gb|AZNH01000008.1|	2	812017	811926	Glu	TTC	811980	811961	50.6
gi|743662138|gb|AZNH01000008.1|	3	601085	600988	Leu	TAA	601047	601032	61.8
gi|743662138|gb|AZNH01000008.1|	4	569780	569699	Gly	GCC	569744	569734	58.1
gi|743662138|gb|AZNH01000008.1|	5	506823	506719	Ser	GCT	506786	506763	63.4
gi|743662138|gb|AZNH01000008.1|	6	503202	503122	Ser	GCT	0	0	66.7
gi|743661189|gb|AZNH01000011.1|	1	383818	383889	iMet	CAT	0	0	68.0
gi|743661189|gb|AZNH01000011.1|	2	694630	694738	Leu	TAG	694667	694693	70.1
gi|743661189|gb|AZNH01000011.1|	3	797359	797288	Gln	CTG	0	0	58.7
gi|743661189|gb|AZNH01000011.1|	4	581597	581524	Val	AAC	0	0	76.4
gi|743661189|gb|AZNH01000011.1|	5	458929	458848	Gly	GCC	458893	458883	58.9
gi|743660945|gb|AZNH01000012.1|	1	775176	775085	Ala	AGC	775140	775121	65.0
gi|743660945|gb|AZNH01000012.1|	2	774942	774843	Ala	AGC	774906	774879	59.7
gi|743660945|gb|AZNH01000012.1|	3	478196	478125	Thr	CGT	0	0	64.2
gi|743660945|gb|AZNH01000012.1|	4	18457	18359	Ala	AGC	18421	18395	59.8
gi|743660732|gb|AZNH01000013.1|	1	120351	120280	Thr	CGT	0	0	69.9
gi|743660510|gb|AZNH01000014.1|	1	401040	400946	Glu	CTC	401003	400981	48.7
gi|743660291|gb|AZNH01000015.1|	1	306744	306817	Val	AAC	0	0	76.4
gi|743660098|gb|AZNH01000016.1|	1	132595	132666	Gln	CTG	0	0	58.7
gi|743660098|gb|AZNH01000016.1|	2	194470	194543	Asn	GTT	0	0	71.5
gi|743660098|gb|AZNH01000016.1|	3	194618	194751	Asn	GTT	194656	194713	46.1
gi|743660098|gb|AZNH01000016.1|	4	194825	194898	Asn	GTT	0	0	72.6
gi|743660098|gb|AZNH01000016.1|	5	193599	193526	Asn	GTT	0	0	72.6
gi|743659891|gb|AZNH01000017.1|	1	232393	232475	His	GTG	232430	232440	53.8
gi|743659891|gb|AZNH01000017.1|	2	232537	232621	His	GTG	232574	232586	53.6
gi|743659707|gb|AZNH01000018.1|	1	168659	168758	Leu	AAG	168697	168714	60.1
gi|743659707|gb|AZNH01000018.1|	2	476316	476215	Ser	CGA	476279	476259	65.5
gi|743659519|gb|AZNH01000019.1|	1	17529	17454	Phe	GAA	0	0	28.7
gi|743659343|gb|AZNH01000020.1|	1	162627	162708	Gly	GCC	162663	162673	58.1
gi|743659343|gb|AZNH01000020.1|	2	300720	300801	Gly	GCC	300756	300766	58.1
gi|743659343|gb|AZNH01000020.1|	3	363500	363590	Pro	AGG	363536	363554	67.5
gi|743659343|gb|AZNH01000020.1|	4	531274	531369	Glu	CTC	531311	531334	51.3
gi|743659160|gb|AZNH01000021.1|	1	249677	249748	Thr	AGT	0	0	81.9
gi|743658995|gb|AZNH01000022.1|	1	45254	45348	Arg	ACG	45290	45312	69.4
gi|743658850|gb|AZNH01000023.1|	1	22051	22123	Cys	GCA	0	0	75.7
gi|743658850|gb|AZNH01000023.1|	2	320455	320587	Ser	TGA	320492	320543	56.3
gi|743658850|gb|AZNH01000023.1|	3	20752	20680	Cys	GCA	0	0	76.1
gi|743658717|gb|AZNH01000024.1|	1	340765	340694	Asp	GTC	0	0	69.5
gi|743658717|gb|AZNH01000024.1|	2	318486	318406	Ser	AGA	0	0	75.5
gi|743658717|gb|AZNH01000024.1|	3	317188	317108	Ser	AGA	0	0	78.5
gi|743658717|gb|AZNH01000024.1|	4	266180	266090	Pro	AGG	266144	266126	67.5
gi|743658612|gb|AZNH01000025.1|	1	117249	117345	Phe	GAA	117286	117309	63.4
gi|743658407|gb|AZNH01000027.1|	1	89008	89079	Gly	TCC	0	0	57.2
gi|743658407|gb|AZNH01000027.1|	2	227945	227831	Arg	ACG	227909	227867	68.6
gi|743658275|gb|AZNH01000028.1|	1	318254	318350	Phe	GAA	318291	318314	63.2
gi|743658111|gb|AZNH01000030.1|	1	286728	286825	Phe	GAA	286765	286789	63.4
gi|743658111|gb|AZNH01000030.1|	2	326942	327030	Thr	TGT	326978	326994	72.9
gi|743658012|gb|AZNH01000031.1|	1	294216	294308	Arg	TCG	294253	294272	59.0
gi|743658012|gb|AZNH01000031.1|	2	9207	9116	Gln	TTG	9170	9151	53.2
gi|743657919|gb|AZNH01000032.1|	1	214052	213944	Arg	ACG	214016	213980	57.8
gi|743657919|gb|AZNH01000032.1|	2	32350	32243	Arg	ACG	32314	32279	59.6
gi|743657533|gb|AZNH01000036.1|	1	235499	235570	Asp	GTC	0	0	69.5
gi|743657533|gb|AZNH01000036.1|	2	88812	88722	Tyr	GTA	88773	88758	60.2
gi|743657426|gb|AZNH01000037.1|	1	81948	82020	Ala	TGC	0	0	57.0
gi|743657325|gb|AZNH01000038.1|	1	88676	88780	Arg	ACG	88712	88744	50.6
gi|743657325|gb|AZNH01000038.1|	2	260674	260588	Tyr	GTA	260635	260624	65.5
gi|743657325|gb|AZNH01000038.1|	3	214671	214600	Asp	GTC	0	0	69.5
gi|743657240|gb|AZNH01000039.1|	1	45926	46020	Arg	CCT	45962	45984	33.7
gi|743657240|gb|AZNH01000039.1|	2	204045	203962	Ile	AAT	204007	203998	77.7
gi|743657168|gb|AZNH01000040.1|	1	113490	113588	Arg	TCT	113527	113552	66.4
gi|743656882|gb|AZNH01000044.1|	1	147979	147891	His	GTG	147942	147926	53.4
gi|743656762|gb|AZNH01000046.1|	1	125504	125588	Lys	CTT	125541	125552	78.2
gi|743656573|gb|AZNH01000049.1|	1	134592	134672	Ser	CGA	0	0	75.3
gi|743656522|gb|AZNH01000050.1|	1	59322	59251	Glu	CTC	0	0	56.5
gi|743656398|gb|AZNH01000052.1|	1	79186	79105	Gly	GCC	79150	79140	58.9
gi|743656297|gb|AZNH01000054.1|	1	85672	85563	Met	CAT	85633	85599	77.2
gi|743656297|gb|AZNH01000054.1|	2	4255	4172	Ile	AAT	4217	4208	77.7
gi|743656079|gb|AZNH01000058.1|	1	69690	69802	Leu	CAG	69728	69758	58.6
gi|743656079|gb|AZNH01000058.1|	2	98762	98844	Trp	CCA	98798	98808	49.5
gi|743656079|gb|AZNH01000058.1|	3	156320	156429	Leu	CAG	156358	156385	58.7
gi|743655799|gb|AZNH01000063.1|	1	49526	49610	Lys	CTT	49563	49574	78.2
gi|743655564|gb|AZNH01000068.1|	1	69902	69818	Lys	CTT	69865	69854	78.2
gi|743655535|gb|AZNH01000069.1|	1	81130	81059	Asp	GTC	0	0	69.5
gi|743655273|gb|AZNH01000075.1|	1	45355	45460	Arg	ACG	45391	45424	69.0
gi|743655273|gb|AZNH01000075.1|	2	58231	58160	Arg	CCT	0	0	66.8
gi|743655240|gb|AZNH01000076.1|	1	49857	49742	Leu	CAA	49819	49786	53.1
gi|743655134|gb|AZNH01000079.1|	1	10008	10079	Gly	CCC	0	0	71.3
gi|743655098|gb|AZNH01000080.1|	1	51673	51744	Gly	TCC	0	0	59.6
gi|743655098|gb|AZNH01000080.1|	2	76293	76222	Asp	GTC	0	0	69.5
gi|743655069|gb|AZNH01000081.1|	1	58909	58992	Ile	AAT	58947	58956	77.7
gi|743655040|gb|AZNH01000082.1|	1	72795	72882	Arg	TCG	72832	72846	59.2
gi|743654870|gb|AZNH01000089.1|	1	5292	5388	Leu	TAA	5329	5351	53.7
gi|743654373|gb|AZNH01000110.1|	1	22485	22582	Phe	GAA	22522	22546	63.1
gi|743654013|gb|AZNH01000130.1|	1	47788	47698	Trp	CCA	47752	47734	56.8
gi|743653466|gb|AZNH01000182.1|	1	49	131	Leu	TAA	0	0	44.0
gi|743653466|gb|AZNH01000182.1|	2	140	211	Ala	TGC	0	0	36.4	pseudo
gi|743653466|gb|AZNH01000182.1|	3	215	287	Phe	GAA	0	0	43.1
gi|743653466|gb|AZNH01000182.1|	4	291	363	Lys	TTT	0	0	50.4
gi|743653466|gb|AZNH01000182.1|	5	2521	2593	His	GTG	0	0	43.7
gi|743653466|gb|AZNH01000182.1|	6	2599	2670	Met	CAT	0	0	44.1
gi|743653466|gb|AZNH01000182.1|	7	11996	12066	Arg	TCT	0	0	63.3
gi|743653466|gb|AZNH01000182.1|	8	17957	18030	Asp	GTC	0	0	31.2
gi|743653466|gb|AZNH01000182.1|	9	18125	18195	Asn	GTT	0	0	61.2
gi|743653466|gb|AZNH01000182.1|	10	19674	19744	Gly	TCC	0	0	41.0	pseudo
gi|743653466|gb|AZNH01000182.1|	11	20560	20632	Val	TAC	0	0	48.7
gi|743653466|gb|AZNH01000182.1|	12	20734	20820	Undet	NNN	0	0	35.4	pseudo
gi|743653466|gb|AZNH01000182.1|	13	20834	20905	Sup	TCA	0	0	33.1	pseudo
gi|743653466|gb|AZNH01000182.1|	14	22458	22530	Pro	TGG	0	0	42.1
gi|743653433|gb|AZNH01000187.1|	1	9525	9623	Phe	GAA	9562	9587	62.0
gi|743653433|gb|AZNH01000187.1|	2	12303	12230	Arg	CCG	0	0	52.2

## Sheet: Mmaj_tRNAout
Sequence		tRNA	Bounds	tRNA	Anti	Intron Bounds		Inf
Name	tRNA #	Begin	End	Type	Codon	Begin	End	Score	Note
--------	------	-----	------	----	-----	-----	----	------	------
gi|743676556|gb|AZNE01000001.1|	1	1792587	1792658	iMet	CAT	0	0	68.0
gi|743676556|gb|AZNE01000001.1|	2	2011512	2011601	Asp	GTC	2011549	2011565	49.4
gi|743676556|gb|AZNE01000001.1|	3	2010552	2010443	Undet	NNN	0	0	22.5	pseudo
gi|743676556|gb|AZNE01000001.1|	4	2009866	2009754	Ser	TGA	2009830	2009787	26.7
gi|743676556|gb|AZNE01000001.1|	5	1991239	1991166	Val	AAC	0	0	76.4
gi|743676556|gb|AZNE01000001.1|	6	1867940	1867859	Gly	GCC	1867904	1867894	58.9
gi|743676556|gb|AZNE01000001.1|	7	1271644	1271541	Pro	TGG	1271608	1271577	67.1
gi|743676556|gb|AZNE01000001.1|	8	990785	990702	Ile	AAT	990747	990738	77.7
gi|743676141|gb|AZNE01000002.1|	1	775288	775391	Arg	ACG	775324	775355	69.4
gi|743676141|gb|AZNE01000002.1|	2	381758	381665	Glu	CTC	381721	381700	48.8
gi|743676141|gb|AZNE01000002.1|	3	381535	381464	Glu	CTC	0	0	56.5
gi|743675766|gb|AZNE01000003.1|	1	121676	121753	Undet	NNN	0	0	40.5
gi|743675766|gb|AZNE01000003.1|	2	371621	371713	Arg	TCG	371658	371677	59.0
gi|743675766|gb|AZNE01000003.1|	3	1253663	1253591	Lys	TTT	0	0	80.7
gi|743675766|gb|AZNE01000003.1|	4	794396	794263	Arg	TCT	794359	794314	30.1	pseudo
gi|743675766|gb|AZNE01000003.1|	5	710040	709959	Val	CAC	710003	709994	53.8
gi|743675766|gb|AZNE01000003.1|	6	82735	82644	Gln	TTG	82698	82679	53.2
gi|743675140|gb|AZNE01000005.1|	1	615968	616039	Gln	CTG	0	0	53.0
gi|743675140|gb|AZNE01000005.1|	2	726745	726674	Thr	AGT	0	0	81.9
gi|743675140|gb|AZNE01000005.1|	3	461657	461562	Ala	AGC	461621	461598	64.8
gi|743675140|gb|AZNE01000005.1|	4	138207	138109	Phe	GAA	138170	138145	59.6
gi|743674841|gb|AZNE01000006.1|	1	52415	52516	Ser	CGA	52452	52472	65.5
gi|743674841|gb|AZNE01000006.1|	2	935391	935512	Undet	NNN	0	0	47.3
gi|743674841|gb|AZNE01000006.1|	3	615882	615811	Thr	CGT	0	0	69.9
gi|743674841|gb|AZNE01000006.1|	4	362592	362493	Leu	AAG	362554	362537	60.1
gi|743674555|gb|AZNE01000007.1|	1	914645	914761	Leu	CAA	914683	914717	53.1
gi|743674303|gb|AZNE01000008.1|	1	157416	157509	Val	TAC	157454	157473	70.8
gi|743674303|gb|AZNE01000008.1|	2	277055	277128	Val	AAC	0	0	76.4
gi|743674303|gb|AZNE01000008.1|	3	418602	418683	Gly	GCC	418638	418648	58.1
gi|743674303|gb|AZNE01000008.1|	4	676070	675999	Thr	AGT	0	0	79.2
gi|743674303|gb|AZNE01000008.1|	5	626040	625951	Pro	AGG	626004	625987	67.5
gi|743674303|gb|AZNE01000008.1|	6	604390	604307	Ile	AAT	604352	604343	77.7
gi|743674303|gb|AZNE01000008.1|	7	532329	532245	Ala	CGC	532292	532281	57.8
gi|743674303|gb|AZNE01000008.1|	8	379247	379143	Arg	ACG	379211	379179	55.4
gi|743674303|gb|AZNE01000008.1|	9	41479	41381	Leu	AAG	41441	41425	60.1
gi|743674303|gb|AZNE01000008.1|	10	40814	40712	Leu	AAG	40776	40756	59.9
gi|743674037|gb|AZNE01000009.1|	1	21461	21549	Thr	TGT	21497	21513	72.9
gi|743674037|gb|AZNE01000009.1|	2	711908	711802	Arg	CCG	711872	711837	64.8
gi|743673824|gb|AZNE01000010.1|	1	102507	102616	Met	CAT	102546	102580	77.2
gi|743673824|gb|AZNE01000010.1|	2	182446	182529	Ile	AAT	182484	182493	77.7
gi|743673824|gb|AZNE01000010.1|	3	230511	230415	Phe	GAA	230474	230451	63.2
gi|743673594|gb|AZNE01000011.1|	1	252487	252560	Val	AAC	0	0	76.4
gi|743673173|gb|AZNE01000013.1|	1	387555	387635	Ser	GCT	0	0	66.7
gi|743673173|gb|AZNE01000013.1|	2	473234	473325	Glu	TTC	473271	473290	50.6
gi|743673173|gb|AZNE01000013.1|	3	683091	683188	Leu	TAA	683129	683144	61.8
gi|743673173|gb|AZNE01000013.1|	4	714255	714336	Gly	GCC	714291	714301	58.1
gi|743673173|gb|AZNE01000013.1|	5	784985	785090	Ser	GCT	785022	785046	60.3
gi|743673173|gb|AZNE01000013.1|	6	722116	722007	Ser	GCT	722079	722051	63.8
gi|743672958|gb|AZNE01000014.1|	1	259648	259772	iMet	CAT	0	0	29.4	pseudo
gi|743672958|gb|AZNE01000014.1|	2	350198	350306	Arg	ACG	350234	350270	63.5
gi|743672762|gb|AZNE01000015.1|	1	440537	440633	Ala	AGC	440573	440597	64.8
gi|743672762|gb|AZNE01000015.1|	2	473931	474052	Undet	NNN	0	0	55.5
gi|743672762|gb|AZNE01000015.1|	3	580688	580771	Lys	CTT	580725	580735	78.3
gi|743672762|gb|AZNE01000015.1|	4	585554	585627	Val	AAC	0	0	76.4
gi|743672592|gb|AZNE01000016.1|	1	210666	210764	Ala	AGC	210702	210728	59.8
gi|743672592|gb|AZNE01000016.1|	2	565980	566066	Tyr	GTA	566019	566030	65.5
gi|743672592|gb|AZNE01000016.1|	3	554262	554157	Ile	TAT	554225	554193	63.3
gi|743672428|gb|AZNE01000017.1|	1	110350	110444	Arg	ACG	110386	110408	69.4
gi|743672118|gb|AZNE01000019.1|	1	340993	341102	Met	CAT	341032	341066	77.2
gi|743672118|gb|AZNE01000019.1|	2	382969	383050	Ser	AGA	0	0	73.5
gi|743671963|gb|AZNE01000020.1|	1	229049	228955	Glu	CTC	229012	228990	48.7
gi|743671830|gb|AZNE01000021.1|	1	88771	88689	His	GTG	88734	88724	53.8
gi|743671830|gb|AZNE01000021.1|	2	88628	88544	His	GTG	88591	88579	53.6
gi|743671556|gb|AZNE01000023.1|	1	19749	19675	Phe	GAA	0	0	34.1
gi|743671429|gb|AZNE01000024.1|	1	383593	383690	Phe	GAA	383630	383654	63.4
gi|743671214|gb|AZNE01000026.1|	1	107554	107463	Ala	AGC	107518	107499	65.0
gi|743671214|gb|AZNE01000026.1|	2	107323	107224	Ala	AGC	107287	107260	59.7
gi|743671091|gb|AZNE01000027.1|	1	232784	232867	Ile	AAT	232822	232831	77.7
gi|743671091|gb|AZNE01000027.1|	2	111251	111167	Lys	CTT	111214	111203	78.2
gi|743670992|gb|AZNE01000028.1|	1	151524	151595	Gln	CTG	0	0	58.7
gi|743670992|gb|AZNE01000028.1|	2	254156	254048	Leu	TAG	254119	254093	70.1
gi|743670886|gb|AZNE01000029.1|	1	69329	69401	Ala	TGC	0	0	64.5
gi|743670886|gb|AZNE01000029.1|	2	159897	159997	Pro	CGG	159933	159961	61.7
gi|743670886|gb|AZNE01000029.1|	3	342109	342180	Thr	AGT	0	0	81.9
gi|743670784|gb|AZNE01000030.1|	1	154781	154710	Thr	CGT	0	0	64.2
gi|743670692|gb|AZNE01000031.1|	1	63856	63927	Gln	CTG	0	0	58.7
gi|743670692|gb|AZNE01000031.1|	2	129335	129468	Asn	GTT	129373	129430	46.1
gi|743670692|gb|AZNE01000031.1|	3	129542	129615	Asn	GTT	0	0	72.6
gi|743670692|gb|AZNE01000031.1|	4	128315	128242	Asn	GTT	0	0	72.6
gi|743670500|gb|AZNE01000033.1|	1	86614	86533	Gly	GCC	86578	86568	58.1
gi|743669958|gb|AZNE01000041.1|	1	144350	144279	Asp	GTC	0	0	69.5
gi|743669958|gb|AZNE01000041.1|	2	123192	123112	Ser	AGA	0	0	75.5
gi|743669958|gb|AZNE01000041.1|	3	122625	122545	Ser	AGA	0	0	75.5
gi|743669958|gb|AZNE01000041.1|	4	120924	120844	Ser	AGA	0	0	74.0
gi|743669722|gb|AZNE01000045.1|	1	73963	74034	Asp	GTC	0	0	69.5
gi|743669656|gb|AZNE01000046.1|	1	93786	93857	Thr	AGT	0	0	81.9
gi|743669656|gb|AZNE01000046.1|	2	131969	131885	Lys	CTT	131932	131921	78.2
gi|743669503|gb|AZNE01000049.1|	1	49963	49831	Ser	TGA	49926	49875	56.3
gi|743669395|gb|AZNE01000051.1|	1	51643	51723	Ser	CGA	0	0	75.3
gi|743669026|gb|AZNE01000061.1|	1	5862	5755	Arg	ACG	5826	5791	59.8
gi|743668993|gb|AZNE01000062.1|	1	141225	141297	Cys	GCA	0	0	76.1
gi|743668993|gb|AZNE01000062.1|	2	139803	139731	Cys	GCA	0	0	75.7
gi|743668823|gb|AZNE01000066.1|	1	48889	48799	Tyr	GTA	48850	48835	60.2
gi|743668774|gb|AZNE01000067.1|	1	114630	114559	Gly	TCC	0	0	59.6
gi|743668774|gb|AZNE01000067.1|	2	100403	100332	Asp	GTC	0	0	69.5
gi|743668658|gb|AZNE01000070.1|	1	41487	41596	Leu	CAG	41525	41552	58.7
gi|743668500|gb|AZNE01000074.1|	1	33950	33860	Trp	CCA	33914	33896	56.8
gi|743668432|gb|AZNE01000076.1|	1	22891	22986	Glu	CTC	22928	22951	51.3
gi|743668189|gb|AZNE01000084.1|	1	53408	53479	Arg	CCT	0	0	66.8
gi|743668116|gb|AZNE01000087.1|	1	62224	62119	Arg	ACG	62188	62155	69.0
gi|743668085|gb|AZNE01000088.1|	1	29354	29452	Phe	GAA	29391	29416	62.0
gi|743668085|gb|AZNE01000088.1|	2	88179	88262	Ile	AAT	88217	88226	77.7
gi|743668085|gb|AZNE01000088.1|	3	32173	32100	Arg	CCG	0	0	52.2
gi|743668050|gb|AZNE01000089.1|	1	80410	80339	Gly	CCC	0	0	71.3
gi|743668025|gb|AZNE01000090.1|	1	19496	19384	Leu	CAG	19458	19428	58.6
gi|743667908|gb|AZNE01000094.1|	1	46012	45928	Lys	CTT	45975	45964	78.2
gi|743667907|gb|AZNE01000095.1|	1	82775	82705	Arg	TCT	0	0	63.3
gi|743667907|gb|AZNE01000095.1|	2	74810	74737	Asp	GTC	0	0	31.2
gi|743667907|gb|AZNE01000095.1|	3	71480	71410	Asn	GTT	0	0	61.2
gi|743667907|gb|AZNE01000095.1|	4	68381	68311	Gly	TCC	0	0	41.0	pseudo
gi|743667907|gb|AZNE01000095.1|	5	67495	67423	Val	TAC	0	0	48.7
gi|743667907|gb|AZNE01000095.1|	6	67321	67235	Undet	NNN	0	0	35.4	pseudo
gi|743667907|gb|AZNE01000095.1|	7	67221	67150	Sup	TCA	0	0	33.1	pseudo
gi|743667907|gb|AZNE01000095.1|	8	65515	65443	Pro	TGG	0	0	42.1
gi|743667907|gb|AZNE01000095.1|	9	59429	59357	Glu	TTC	0	0	53.5
gi|743667907|gb|AZNE01000095.1|	10	59258	59186	Met	CAT	0	0	34.8	pseudo
gi|743667907|gb|AZNE01000095.1|	11	59185	59103	Leu	TAA	0	0	45.5
gi|743667907|gb|AZNE01000095.1|	12	59090	59024	Undet	NNN	0	0	34.7	pseudo
gi|743667907|gb|AZNE01000095.1|	13	57125	57052	Phe	GAA	0	0	54.5
gi|743667907|gb|AZNE01000095.1|	14	57037	56966	Ala	TGC	0	0	34.2	pseudo
gi|743667907|gb|AZNE01000095.1|	15	56826	56754	Lys	TTT	0	0	47.9
gi|743667907|gb|AZNE01000095.1|	16	55576	55503	His	GTG	0	0	49.1
gi|743667907|gb|AZNE01000095.1|	17	54625	54553	Met	CAT	0	0	35.6	pseudo
gi|743667907|gb|AZNE01000095.1|	18	32016	31946	Arg	TCT	0	0	63.3
gi|743667907|gb|AZNE01000095.1|	19	24051	23978	Asp	GTC	0	0	31.2
gi|743667907|gb|AZNE01000095.1|	20	20721	20651	Asn	GTT	0	0	61.2
gi|743667907|gb|AZNE01000095.1|	21	17622	17552	Gly	TCC	0	0	41.0	pseudo
gi|743667907|gb|AZNE01000095.1|	22	16736	16664	Val	TAC	0	0	48.7
gi|743667907|gb|AZNE01000095.1|	23	16562	16476	Undet	NNN	0	0	35.4	pseudo
gi|743667907|gb|AZNE01000095.1|	24	16462	16391	Sup	TCA	0	0	33.1	pseudo
gi|743667907|gb|AZNE01000095.1|	25	14756	14684	Pro	TGG	0	0	42.1
gi|743667907|gb|AZNE01000095.1|	26	8747	8677	Thr	TGT	0	0	30.4	pseudo
gi|743667907|gb|AZNE01000095.1|	27	8670	8598	Glu	TTC	0	0	53.5
gi|743667907|gb|AZNE01000095.1|	28	8499	8427	Met	CAT	0	0	34.8	pseudo
gi|743667907|gb|AZNE01000095.1|	29	8426	8344	Leu	TAA	0	0	45.5
gi|743667907|gb|AZNE01000095.1|	30	8331	8265	Undet	NNN	0	0	34.7	pseudo
gi|743667907|gb|AZNE01000095.1|	31	6366	6293	Phe	GAA	0	0	54.5
gi|743667907|gb|AZNE01000095.1|	32	6278	6207	Ala	TGC	0	0	34.2	pseudo
gi|743667907|gb|AZNE01000095.1|	33	6067	5995	Lys	TTT	0	0	47.9
gi|743667907|gb|AZNE01000095.1|	34	4817	4744	His	GTG	0	0	49.1
gi|743667818|gb|AZNE01000099.1|	1	41523	41616	Arg	ACG	41559	41580	69.4
gi|743667818|gb|AZNE01000099.1|	2	84356	84269	Glu	TTC	84319	84304	56.1
gi|743667667|gb|AZNE01000104.1|	1	14463	14549	Tyr	GTA	14502	14513	65.5
gi|743667667|gb|AZNE01000104.1|	2	58604	58675	Asp	GTC	0	0	69.5
gi|743667648|gb|AZNE01000105.1|	1	19696	19792	Phe	GAA	19733	19756	63.4
gi|743667584|gb|AZNE01000108.1|	1	24046	24117	Gly	TCC	0	0	56.1
gi|743667485|gb|AZNE01000112.1|	1	20584	20513	Asp	GTC	0	0	69.5
gi|743667401|gb|AZNE01000116.1|	1	49102	48994	Arg	ACG	49066	49030	64.7
gi|743667379|gb|AZNE01000117.1|	1	7647	7543	Arg	ACG	7611	7579	50.1
gi|743667359|gb|AZNE01000118.1|	1	306	421	Leu	CAA	344	377	53.1
gi|743667223|gb|AZNE01000125.1|	1	52686	52776	Pro	AGG	52722	52740	67.5
gi|743667088|gb|AZNE01000132.1|	1	16695	16598	Phe	GAA	16658	16634	63.1
gi|743667044|gb|AZNE01000135.1|	1	49750	49822	Ala	TGC	0	0	57.0
gi|743666791|gb|AZNE01000151.1|	1	30070	30157	Arg	TCG	30107	30121	59.2
gi|743666541|gb|AZNE01000169.1|	1	21896	21814	Trp	CCA	21860	21850	49.5
gi|743666065|gb|AZNE01000232.1|	1	3902	3998	Leu	TAA	3939	3961	53.7
gi|743657911|gb|AZNE01000383.1|	1	7269	7167	Arg	ACG	7233	7203	69.1
gi|743656693|gb|AZNE01000424.1|	1	5274	5361	Glu	TTC	5311	5326	56.1
gi|743655356|gb|AZNE01000483.1|	1	1920	1824	Leu	TAA	1883	1861	53.7
gi|743652957|gb|AZNE01000747.1|	1	670	801	Arg	TCT	707	762	26.9	pseudo
gi|743652852|gb|AZNE01000780.1|	1	474	607	Arg	TCT	511	556	30.1	pseudo
gi|743646545|gb|AZNE01000903.1|	1	306	379	Val	AAC	0	0	76.4

## Sheet: Macr_tRNAout
Sequence		tRNA	Bounds	tRNA	Anti	Intron Bounds		Inf
Name	tRNA #	Begin	End	Type	Codon	Begin	End	Score	Note
--------	------	-----	------	----	-----	-----	----	------	------
GL698470.1	1	256597	256676	Pro	TGG	0	0	45.1
GL698470.1	2	257434	257513	Pro	TGG	0	0	45.1
GL698470.1	3	379793	379901	Leu	TAG	379830	379856	70.1
GL698470.1	4	1238946	1239027	Gly	GCC	1238982	1238992	58.1
GL698470.1	5	1657718	1657626	Arg	TCG	1657681	1657662	59.0
GL698470.1	6	1462341	1462232	Met	CAT	1462302	1462268	77.2
GL698470.1	7	268186	268097	Val	AAC	268148	268133	67.8
GL698470.1	8	129331	129250	Gly	GCC	129295	129285	58.9
GL698471.1	1	138683	138788	Ser	CGA	138720	138744	65.3
GL698471.1	2	634760	634886	Arg	TCT	0	0	49.3
GL698471.1	3	715861	715945	Val	CAC	715898	715910	53.7
GL698471.1	4	1028605	1028704	Phe	GAA	1028642	1028668	62.0
GL698471.1	5	531450	531379	Asp	GTC	0	0	69.5
GL698471.1	6	455106	455007	Leu	AAG	455068	455051	60.1
GL698472.1	1	295035	295126	Glu	TTC	295072	295091	55.9
GL698472.1	2	541742	541823	Gly	GCC	0	0	30.4
GL698472.1	3	611163	611301	Arg	GCG	611200	611257	54.0
GL698472.1	4	611407	611542	Arg	GCG	611444	611498	50.3
GL698472.1	5	613398	613260	Arg	GCG	613361	613304	50.9
GL698473.1	1	670610	670527	Lys	CTT	670573	670563	78.3
GL698473.1	2	665176	665103	Val	AAC	0	0	76.1
GL698474.1	1	498647	498718	Thr	AGT	0	0	81.9
GL698474.1	2	605681	605610	Gln	CTG	0	0	53.0
GL698475.1	1	532401	532471	Asn	GTT	0	0	54.4
GL698475.1	2	534794	534864	Gly	ACC	0	0	40.8	pseudo
GL698475.1	3	534874	534945	Gly	TCC	0	0	29.0	pseudo
GL698475.1	4	536966	537038	Pro	TGG	0	0	39.3
GL698475.1	5	540843	540915	Pro	TGG	0	0	39.3
GL698475.1	6	170214	170143	Thr	AGT	0	0	81.0
GL698475.1	7	75932	75817	Leu	CAA	75894	75861	53.1
GL698478.1	1	411765	411835	Thr	CGT	0	0	34.1
GL698480.1	1	252202	252282	Ser	CGA	0	0	75.3
GL698481.1	1	463261	463332	Asp	GTC	0	0	69.5
GL698481.1	2	487809	487889	Ser	AGA	0	0	75.5
GL698481.1	3	489125	489206	Ser	AGA	0	0	75.8
GL698481.1	4	538924	539014	Pro	AGG	538960	538978	67.5
GL698482.1	1	279326	279397	Glu	CTC	0	0	56.5
GL698483.1	1	443524	443441	Ile	AAT	443486	443477	77.7
GL698484.1	1	110114	110185	Asp	GTC	0	0	69.5
GL698484.1	2	213320	213236	Lys	CTT	213283	213272	78.2
GL698486.1	1	336335	336406	Glu	CTC	0	0	56.5
GL698486.1	2	336548	336619	Glu	CTC	0	0	56.5
GL698487.1	1	129435	129507	Lys	TTT	0	0	80.7
GL698489.1	1	344434	344537	Pro	TGG	344470	344501	67.1
GL698492.1	1	374978	374870	Arg	ACG	374942	374906	68.9
GL698493.1	1	409130	409212	His	GTG	409167	409177	53.8
GL698495.1	1	362580	362712	Asn	GTT	362618	362676	44.3
GL698495.1	2	362792	362927	Asn	GTT	362830	362892	53.6
GL698495.1	3	361626	361495	Asn	GTT	361588	361532	47.5
GL698496.1	1	221066	220942	Ile	GAT	221029	220978	34.8
GL698500.1	1	366491	366570	Undet	NNN	0	0	35.0
GL698500.1	2	197716	197637	Thr	AGT	0	0	26.7	pseudo
GL698501.1	1	198056	198127	Thr	AGT	0	0	81.9
GL698501.1	2	243628	243544	Lys	CTT	243591	243580	78.2
GL698502.1	1	215539	215423	Leu	CAA	215501	215467	53.1
GL698503.1	1	39888	39984	Ala	CGC	39924	39948	46.8
GL698503.1	2	184303	184232	Thr	AGT	0	0	75.1
GL698503.1	3	133258	133169	Pro	AGG	133222	133205	67.5
GL698503.1	4	105463	105380	Ile	AAT	105425	105416	77.7
GL698504.1	1	189551	189461	Tyr	GTA	189512	189497	60.2
GL698504.1	2	44394	44262	Ser	TGA	44357	44306	56.3
GL698506.1	1	66853	66926	Val	AAC	0	0	76.4
GL698510.1	1	150557	150628	Gln	CTG	0	0	58.7
GL698511.1	1	240247	240330	Ile	AAT	240285	240294	77.7
GL698511.1	2	115720	115636	Lys	CTT	115683	115672	78.2
GL698513.1	1	91599	91528	Arg	CCT	0	0	70.9
GL698513.1	2	8022	7913	Met	CAT	7983	7949	77.2
GL698514.1	1	145184	145257	Arg	CCG	0	0	53.1
GL698514.1	2	261332	261248	Lys	CTT	261295	261284	78.2
GL698514.1	3	88739	88656	Ile	AAT	88701	88692	77.7
GL698515.1	1	106504	106575	Gln	CTG	0	0	58.7
GL698516.1	1	165534	165628	Glu	CTC	165571	165593	48.7
GL698517.1	1	155886	155974	His	GTG	155923	155939	53.4
GL698519.1	1	212435	212531	Arg	ACG	212471	212495	69.3
GL698522.1	1	62776	62870	Val	TAC	62814	62834	68.1
GL698522.1	2	197434	197532	Leu	AAG	197472	197488	60.1
GL698522.1	3	198084	198186	Leu	AAG	198122	198142	59.9
GL698523.1	1	168207	168126	Gly	GCC	168171	168161	58.9
GL698525.1	1	83825	83897	Ala	TGC	0	0	64.5
GL698528.1	1	67461	67389	Ala	TGC	0	0	57.0
GL698535.1	1	79114	79180	Undet	NNN	0	0	26.3	pseudo
GL698535.1	2	81598	81670	Phe	GAA	0	0	53.0
GL698535.1	3	81674	81746	Lys	TTT	0	0	46.8
GL698535.1	4	84488	84560	Gln	TTG	0	0	41.0	pseudo
GL698535.1	5	85347	85419	His	GTG	0	0	43.7
GL698535.1	6	85425	85496	Met	CAT	0	0	44.1
GL698537.1	1	18708	18614	Ala	AGC	18672	18650	64.9
GL698538.1	1	92319	92414	Arg	ACG	92355	92378	69.4
GL698541.1	1	96015	95908	Val	AAC	95977	95944	68.2
GL698542.1	1	82462	82391	Gly	TCC	0	0	57.2
GL698543.1	1	95739	95835	Ala	AGC	95775	95799	64.8
GL698551.1	1	71710	71822	Leu	CAG	71748	71778	49.7
GL698551.1	2	95374	95456	Trp	CCA	95410	95420	49.5
GL698551.1	3	153100	153208	Leu	CAG	153138	153164	58.7
GL698554.1	1	137186	137283	Phe	GAA	137223	137247	63.4
GL698557.1	1	79949	79861	Glu	TTC	79912	79896	56.0
GL698561.1	1	6572	6644	Cys	GCA	0	0	75.7
GL698561.1	2	5438	5366	Cys	GCA	0	0	75.8
GL698563.1	1	37881	37981	Pro	CGG	37917	37945	61.7
GL698564.1	1	125194	125298	Arg	ACG	125230	125262	69.0
GL698567.1	1	24113	24211	Arg	ACG	24149	24175	69.3
GL698572.1	1	83707	83626	Gly	GCC	83671	83661	58.1
GL698583.1	1	10519	10615	Phe	GAA	10556	10579	63.4
GL698589.1	1	19196	19113	Ile	AAT	19158	19149	77.7
GL698590.1	1	7032	6961	Glu	CTC	0	0	56.5
GL698592.1	1	7701	7792	Gln	TTG	7738	7757	53.2
GL698593.1	1	17354	17444	Trp	CCA	17390	17408	56.8
GL698597.1	1	43454	43357	Phe	GAA	43417	43393	35.4
GL698599.1	1	58425	58338	Arg	TCG	58388	58374	59.2
GL698600.1	1	21980	22076	Phe	GAA	22017	22040	63.2
GL698600.1	2	63161	63242	Ser	AGA	0	0	66.1
GL698611.1	1	7020	7091	Asp	GTC	0	0	69.5
GL698615.1	1	19209	19301	Tyr	GTA	19248	19265	65.3
GL698615.1	2	5811	5706	Ile	TAT	5774	5742	63.3
GL698617.1	1	45921	46011	Pro	AGG	45957	45975	67.5
GL698618.1	1	7959	7888	Gly	CCC	0	0	71.3
GL698620.1	1	16778	16849	iMet	CAT	0	0	68.0
GL698623.1	1	46055	45959	Ala	AGC	46019	45995	64.8
GL698623.1	2	45520	45427	Ala	AGC	45484	45463	64.0
GL698632.1	1	16197	16126	Asp	GTC	0	0	69.5
GL698636.1	1	25405	25314	Tyr	GTA	25366	25350	65.0
GL698641.1	1	11613	11542	Gly	TCC	0	0	59.6
GL698642.1	1	23713	23632	Thr	TGT	23677	23668	73.2
GL698645.1	1	14865	14946	Gly	GCC	14901	14911	58.1
GL698656.1	1	23547	23626	Undet	NNN	0	0	31.7
GL698657.1	1	9578	9674	Leu	TAA	9615	9637	52.7

[truncated: 2 more sheets: Malb_tRNAout, Mril_tRNAout]
